# Supplementary material for: ‘Just a GP’: a mixed method study of undermining of general practice as a career choice in the UK
Source: PubMed Central journal article supplement — BMJ Open. 2017 Nov 3;7(11):e018520. doi: 10.1136/bmjopen-2017-018520 (PMC5722080; doi:10.1136/bmjopen-2017-018520), 2017-11-03
Supplement: bmjopen-2017-018520.draft_revisions.pdf [file bmjopen-2017-018520.draft_revisions.pdf]

# BMJ Open

BMJ Open is committed to open peer review. As part of this commitment we make the peer review history of every article we publish publicly available.

When an article is published we post the peer reviewers' comments and the authors' responses online. We also post the versions of the paper that were used during peer review. These are the versions that the peer review comments apply to.

The versions of the paper that follow are the versions that were submitted during the peer review process. They are not the versions of record or the final published versions. They should not be cited or distributed as the published version of this manuscript.

BMJ Open is an open access journal and the full, final, typeset and author-corrected version of record of the manuscript is available on our site with no access controls, subscription charges or pay-per-view fees (<http://bmjopen.bmj.com>).

If you have any questions on BMJ Open's open peer review process please email [editorial.bmjopen@bmj.com](mailto:editorial.bmjopen@bmj.com)

# BMJ Open

## "Just a GP": A mixed method study of undermining of General Practice as a career choice in the UK

|                                 |                                                                                                                                                                                                                                                                                      |
|---------------------------------|--------------------------------------------------------------------------------------------------------------------------------------------------------------------------------------------------------------------------------------------------------------------------------------|
| Journal:                        | <i>BMJ Open</i>                                                                                                                                                                                                                                                                      |
| Manuscript ID                   | bmjopen-2017-018520                                                                                                                                                                                                                                                                  |
| Article Type:                   | Research                                                                                                                                                                                                                                                                             |
| Date Submitted by the Author:   | 06-Jul-2017                                                                                                                                                                                                                                                                          |
| Complete List of Authors:       | Alberti, Hugh; Newcastle University, School of Medical Education<br>Banner, Kimberley; Newcastle University, School of medical education<br>Collingwood, Helen; Newcastle University, School of Medical Education<br>Merritt, Kym; Newcastle University, School of medical education |
| <b>Primary Subject Heading</b>: | General practice / Family practice                                                                                                                                                                                                                                                   |
| Secondary Subject Heading:      | General practice / Family practice, Medical education and training, Qualitative research                                                                                                                                                                                             |
| Keywords:                       | EDUCATION & TRAINING (see Medical Education & Training), PRIMARY CARE, QUALITATIVE RESEARCH                                                                                                                                                                                          |
|                                 |                                                                                                                                                                                                                                                                                      |

SCHOLARONE™  
Manuscripts

1  
2  
3  
4  
5  
6  
7  
8  
9  
10  
11  
12  
13  
14  
15  
16  
17  
18  
19

## **“Just a GP”: A mixed method study of undermining of General Practice as a career choice in the UK**

20 Hugh Alberti, Kimberley Banner, Helen Collingwood, Kymberlee Merritt

21 Hugh Alberti.

22 Subdean for Primary and community care, Newcastle university.

23 Newcastle School of Medical Education, The Faculty of Medical Sciences, Cookson Building,  
24 Newcastle University, NE2 4HH  
25  
26

27 Kimberley Banner

28 GP Speciality Trainee, Durham Tees Valley GP training programme.

29 Health Education North East Lead Employer Trust, Waterfront, 4 Goldcrest Way, Newburn  
30 Riverside, Newcastle Upon Tyne, NE15 8NY  
31  
32

33 Helen Collingwood

34 GP Speciality Trainee, Durham Tees Valley GP training Programme

35 Health Education North East Lead Employer Trust, Waterfront, 4 Goldcrest Way, Newburn  
36 Riverside, Newcastle Upon Tyne, NE15 8NY  
37  
38

39 Kymberlee Merritt

40 GP Speciality Trainee, Durham Tees Valley GP training programme.

41 Health Education North East Lead Employer Trust, Waterfront, 4 Goldcrest Way, Newburn  
42 Riverside, Newcastle Upon Tyne, NE15 8NY  
43  
44

45  
46  
47 Correspondence to: Kimberley Banner, [Kimberley.banner@gmail.com](mailto:Kimberley.banner@gmail.com)  
48  
49  
50  
51  
52  
53  
54  
55  
56  
57  
58  
59  
60

### Copyright/licence for publication

*“The Corresponding Author has the right to grant on behalf of all authors and does grant on behalf of all authors, [a worldwide licence](#) to the Publishers and its licensees in perpetuity, in all forms, formats and media (whether known now or created in the future), to i) publish, reproduce, distribute, display and store the Contribution, ii) translate the Contribution into other languages, create adaptations, reprints, include within collections and create summaries, extracts and/or, abstracts of the Contribution, iii) create any other derivative work(s) based on the Contribution, iv) to exploit all subsidiary rights in the Contribution, v) the inclusion of electronic links from the Contribution to third party material where-ever it may be located; and, vi) licence any third party to do any or all of the above.”*

### Competing interests' statement

We have read and understood BMJ policy on declaration of interests and declare that we have no competing interests. All authors have completed the ICMJE uniform disclosure form at [www.icmje.org/coi\\_disclosure.pdf](http://www.icmje.org/coi_disclosure.pdf). All Authors declare that we have no support from any organisation for the submitted work; no financial relationships with any organisations that might have an interest in the submitted work in the previous three years, no other relationships or activities that could appear to have influenced the submitted work.

Funding for transcription and the cost of focus groups was provided by the Faculty of Medical Sciences at Newcastle University.

### Guarantor and Contributors

The study proposal was proposed by Hugh Alberti and developed jointly by Hugh Alberti, Kimberley Banner, Helen Collingwood and Kymberlee Merritt. The focus groups were undertaken by Hugh Alberti and Kymberlee Merritt and analysed by Hugh Alberti and Kymberlee Merritt. The survey data was analysed by Helen Collingwood and Kimberley Banner. The paper was written by all authors jointly and all authors approved the final version of the paper.

The guarantor for this paper is Hugh Alberti. Dr Alberti affirms that the manuscript is an honest, accurate, and transparent account of the study being reported; that no important aspects of the study have been omitted; and that any discrepancies from the study as planned have been explained.

### Acknowledgements

Thanks to the Faculty of Medical Sciences at Newcastle University for funding the focus group study. Thanks to the Postgraduate Primary Care School and Foundation School at Health Education England (across the Northeast and North Cumbria) for collecting the questionnaire evaluation data, and for funding the GP speciality trainees undertaking an education attachment, to the Durham tees Valley and Northumbria Training Programmes for facilitating access to the General Practice speciality trainees and the participating trainees for their time. Thanks also to Jo Hall for her early help in the project and to Alison Bonavia and Bob Mckinley for advice on drafts of the manuscript.

### Ethics Approval

1  
2  
3 Ethics approval granted by Newcastle University Ethics approval committee.  
4

5 Ethics Approval application number: 00911/2015  
6

7 Survey data from routine programme evaluation data, which has been anonymised.  
8 Appendices containing further information given to focus group participants can be found at  
9 the end of the document.  
10

### 11 **Data Sharing Statement** 12

13 Additional unpublished data, quotes from focus groups and survey questions which have  
14 not been included in the paper, can be requested via the corresponding author.  
15  
16  
17  
18  
19  
20  
21  
22  
23  
24  
25  
26  
27  
28  
29  
30  
31  
32  
33  
34  
35  
36  
37  
38  
39  
40  
41  
42  
43  
44  
45  
46  
47  
48  
49  
50  
51  
52  
53  
54  
55  
56  
57  
58  
59  
60

# **“Just a GP”: A mixed method study of undermining of General Practice as a career choice in the UK**

## **Abstract**

### Objectives

Failure to recruit sufficient applicants to General Practice training has been a problem both nationally and internationally for many years and undermining of GP is one possible contributing factor. The aim of our study was to ascertain what comments, both negative and positive, are being made in UK clinical settings to GP trainees about GP and to further explore these comments and their influence on career choice.

### Methodology

We conducted a mixed methods study. We surveyed all Foundation Doctors and General Practice trainees within one region of HEE regarding any comments they experienced relating to a career in General Practice. We also conducted six focus groups with early GP trainees to discuss any comments that they experienced and whether these comments had any influence on their or others career choice.

### Results

Both positive and negative comments are being made to trainees regarding General Practice as a career choice. The reasons for, and origin of the comments are multifactorial in nature. Thematic analysis of the focus groups identified key influential themes such as previous exposure to and experience of GP, family members who were GPs, GP role models, demographics of the clinician and referral behaviour. Trainees perceived that negative comments may be discouraging others from choosing General Practice as a career.

### Conclusion

Our study demonstrates that negative comments towards GP as a career do exist within clinical settings and are having a potential impact on poor recruitment rates to General Practice training. We have identified areas in which further negative comments could be prevented by changing perceptions of GP as a career. Additional time spent in General practice as undergraduates and postgraduates, and positive GP role models, could particularly benefit recruitment. We recommend that undermining of General Practice as a career choice be approached with a zero-tolerance policy.

## **Article Summary**

Strengths and limitations of this study:

- Qualitative and quantitative data from both focus groups and end of year survey data.
- Responses gained from trainees in Foundation year two and General Practice speciality training.
- Surveys and focus groups all rely on retrospective narratives from Junior doctorsthereforetime since an experience may reduce the reliability of this data.
- Focus groups of GP Trainees at the start of their training and further research may be needed into how experiences change throughout training.
- No data gathered from the medical student population and further research needed in order to see if denigration of general practice is a problem in this group.

## **Introduction**

General Practice recruitment is of increasing concern internationally. Recent efforts to improve recruitment in the UK have resulted only in slight improvement with training places left unfilled in some regions.[1] These low recruitment levels are in the context of the pledge to increase General Practice (GP) training recruitment, with the target of 50% of postgraduate medical training places being allocated to GP.[2] However, the proportion of UK medical graduates intending to enter GP is well below this target, with the proportion reducing rather than increasing.[3, 4, 5]

It of paramount importance, therefore, to address barriers to recruitment and explore the factors that impact on medical students' and foundation doctors' career aspirations. Career choice intentions of medical students is a complex issue with multiple modifiable and non-modifiable factors reported, such as exposure to specialty, role models, financial reward, prestige and workload.[6, 7] The situation around General Practice as a career choice is similarly complex and includes pre-training perceptions, medical school influences and postgraduate factors.[8]

One area rarely addressed until recently is the issue of undermining of career choices. It has been suggested, based predominantly on anecdotal evidence, that negative comments made to students and trainees may influence career choices. A notable exception was a recent survey of medical students who reported that psychiatry and GP attracted the greatest number of negative comments, which were made by academic staff, doctors and students. This supports a recent report by Health Education England and the Medical Schools Council (HEE/MSC) on raising the profile of GP at medical schools that stated explicitly amongst its recommendations: "Work should take place to tackle undermining of GP as a career across all medical school settings including primary care".[8]

Denigration of GP has been studied more extensively internationally within other contexts. Analysis of data from the United States has demonstrated fairly high levels of discouragement about, or denigration of primary care, through five decades.[9, 10, 11, 12, 13] Similarly, Canadian medical students report particular denigration of family doctors and a general feeling of lack of respect between specialities[14, 15] and Australian students report poor status of GP to be a particular negative factor in relation to future career choice.[16]

Study of the denigration of GP in the UK has been limited to focusing on career intention [9, 14, 17, 18] and many questions remain unanswered.[19] Firstly, to what extent are undermining comments being made in clinical UK settings? Secondly, why are comments being made, i.e. what are the factors underlying these comments? And thirdly, and most crucially of all, do the comments influence the eventual career choice of potential General Practitioners? Thus, the aim of our study was to ascertain what comments, both negative and positive, are being made in clinical settings to trainees about GP and to explore these comments and their influence on career choice with trainees who have chosen a career in GP.

## **Method**

1  
2  
3 We undertook a mixed method study, incorporating both quantitative and qualitative  
4 methods, to address the research question.  
5

## 6 **Survey**

7  
8 We asked all Foundation Doctors (FDs) and General Practice Specialty Registrars (GPSTs)  
9 within one Health Education England (HEE) region about comments that they had received  
10 regarding GP as a career option, within a pre-existing online, end of post evaluation survey.  
11 FDs in the UK are one and two years post-graduation and GPSTs are at least three years  
12 post-graduation, some having many more years of experience prior to commencing GP  
13 training. The following questions were asked:  
14

- 15
- 16 • FDs: “So far in your foundation training have you received any specific comments, either  
17 positive or negative, regarding GP as a career option?” This was asked within the annual,  
18 regional FDsurvey in mid-2016 towards the end of their Foundation Year 1 or 2.  
19
- 20 • GPSTs: “In this post have you had any specific comments made, either positive or  
21 negative, about your choice of career to be a General Practitioner?” This was asked  
22 within their End of Post Feedback Survey in July 2016 (following completion of a 6  
23 month GP or Hospital Training Post).  
24

25  
26 Comments were reviewed by the research team, classified as a negative, positive or mixed  
27 and then grouped by theme and commentator.  
28

## 29 **Focus groups**

30  
31 We undertook six focus groups with new GPSTs from the two largest GP training programs  
32 in one HEE region. We purposefully selected trainees who had chosen GP as a career  
33 relatively recently and were thus most likely to be able to recall the rationale for their career  
34 choice and potential influencers, such as comments made by clinicians. Trainees were  
35 invited by email to participate. Focus group interviews were conducted by members of the  
36 research team using a semi-structured interview format to allow participants to elaborate  
37 on their experiences. Focus group interviews varied in size from four to ten participants.  
38 Each interview lasted approximately 40 minutes and were digitally recorded and  
39 professionally transcribed verbatim. Two researchers checked the transcripts in order to  
40 confirm the accuracy of transcriptions and to ensure that sufficient participant discussion  
41 had taken place, with minimal input from the researcher, allowing rich, authentic data to be  
42 captured. Participants were asked to describe and recall any comments made to them by  
43 primary or secondary care clinicians, at any point in their training, regarding a career choice  
44 of GP. They were asked to expand on the comments and discuss similar or contrasting  
45 experiences, and whether they felt that the comments had affected their career choice in  
46 any way. Thematic analysis, based on the model outlined by Braun and Clarke[20] was  
47 carried out by two members of the research team. Participants were fully consented and  
48 approval was granted by the University Faculty ethical board.  
49  
50  
51  
52

## 53 **Results**



Our study has demonstrated that both negative and positive comments are being made to trainees about a career in GP in the UK and a number of influencing factors have emerged. Many trainees reported comments and a significant minority of FDs (19%), and GPSTs (6%), reported negative comments. Qualitative analysis revealed a number of factors that appear to be underlying clinicians' perceptions of GP (see Figure 1): Previous exposure to and experience of GP, family members who were General Practitioners (GPs), GP role models, age and speciality of clinician, lone working, the future of the NHS and the influence of referral behaviour.

### Survey results

#### FDs

There were 780 responses to the survey from 839 FDs (response rate=93%). 232 (30%) FDs reported having received comments about GP as a career choice. 91 FDs reported positive comments (12% of responders), 50 reported negative comments (6%) and 56 reported both positive and negative comments (7%).

#### GPSTs

There were 343 responses to the end of post evaluation from 399 trainees (response rate=86%). 138 (40%) GPSTs reported comments during their previous six-month post. 115 trainees reported positive comments (33% of responders), 15 reported negative comments (4%) and 8 reported both positive and negative comments (2%).

**Table 1: Comments about GP as a career by theme**

|                 | Theme                               | n (FD) | % (FD)* | n (GPST) | % (GPST)* |
|-----------------|-------------------------------------|--------|---------|----------|-----------|
| <b>Positive</b> | Work life balance                   | 20     | 30%     | 14       | 23%       |
|                 | Good training programme             | 16     | 24%     | 5        | 8%        |
|                 | Variety                             | 6      | 9%      | 5        | 8%        |
|                 | Special interests                   | 4      | 6%      | -        | -         |
|                 | Recruitment crisis- easy to get job | 4      | 6%      | 2        | 3%        |
|                 | Flexible                            | 4      | 6%      | 1        | 2%        |
|                 | Continuity of Care                  | -      | -       | 3        | 5%        |
|                 | Less stress                         | 1      | 2%      | -        | -         |
|                 | Lifestyle                           | 1      | 2%      | -        | -         |
|                 | Short training                      | 1      | 2%      | -        | -         |
|                 | Pay                                 | -      | -       | 1        | 2%        |
| Holistic        | -                                   | -      | 1       | 2%       |           |
| <b>Negative</b> | Workload                            | 25     | 34%     | 2        | 9%        |
|                 | A waste                             | 6      | 8%      | 3        | 14%       |
|                 | Easy choice                         | 5      | 7%      | 4        | 18%       |
|                 | Boring                              | 6      | 8%      | 2        | 9%        |

|                                          |   |     |    |     |
|------------------------------------------|---|-----|----|-----|
| Stress                                   | 6 | 8%  | 2  | 9%  |
| Bad referrals                            | 6 | 8%  | -  | -   |
| Paperwork                                | 3 | 4%  | 1  | 5%  |
| Why be a GP?                             | 1 | 1%  | 3  | 14% |
| Trivial patient problems                 | - | -   | 3  | 14% |
| A few GPs give the profession a bad name | - | -   | 2  | 9%  |
| Recruitment crisis                       | 2 | 3%  | -  | -   |
| Training scheme                          | 2 | 3%  | -  | -   |
| Blame environment                        | 2 | 3%  | -  | -   |
| Time constraints                         | 2 | 3%  | -  | -   |
| E-portfolio                              | 1 | 1%  | -  | -   |
| QOF                                      | 1 | 1%  | -  | -   |
| Complaints                               | 1 | 1%  | -  | -   |
| "For those who can't do anything else"   | 1 | 1%  | -  | -   |
| Media opinion                            | 1 | 1%  | -  | -   |
| Isolating                                | 1 | 1%  | -  | -   |
| Uncertain future                         | 1 | 1%  | -  | -   |
| <b>Ambiguous</b>                         |   |     |    |     |
| "You would make a good GP"               | 9 | 14% | 28 | 47% |

\* Percentages are based on the total number of responses within that group. Some comments contained more than one area. Many trainees reported hearing positive and/or negative comments but did not expand further.

**Table 2: Comments about GP as a career by commentator**

|                 | Commentator                          | n (FD) | % (FD) | n (GPST) | % (GPST) |
|-----------------|--------------------------------------|--------|--------|----------|----------|
| <b>Positive</b> | GPSTs                                | 60     | 57%    | 4        | 4%       |
|                 | GPs                                  | 23     | 22%    | 35       | 31%      |
|                 | Consultants                          | 10     | 10%    | 29       | 26%      |
|                 | Junior/middle grade hospital doctors | 9      | 9%     | 25       | 22%      |
|                 | Nursing staff                        | 1      | 1%     | 7        | 6%       |
|                 | Patients                             | 1      | 1%     | 1        | 1%       |
|                 | Other                                | -      | -      | 11       | 10%      |
| <b>Negative</b> | Junior/middle grade hospital doctors | 29     | 39%    | 6        | 22%      |
|                 | Consultants                          | 20     | 27%    | 8        | 30%      |
|                 | GPs                                  | 11     | 15%    | 3        | 11%      |
|                 | GPSTs                                | 9      | 11%    | -        | -        |
|                 | Nursing staff                        | 6      | 8%     | 3        | 11%      |
|                 | Patients                             | -      | -      | -        | -        |
|                 | Other (non-clinical staff)           | -      | -      | 7        | 26%      |

\* Percentages are based on the total number of responses within that group. Some comments contained more than one area. Many trainees reported hearing positive and/or negative comments but did not expand further.

### Comments

1  
2  
3 Table 1 displays the types of comments reported by FD and GPST doctors. The most  
4 common types of positive comment were the generic statement “you would make a good  
5 GP” (predominantly made to GPSTs; GPSTs perceived this as a positive comment but it could  
6 be argued that this is not necessarily the case), work-life balance issues, the view that the  
7 GP training programme was good (predominantly made to FDs) and the variety of the job.  
8 Workload was the most common negative comment made to FDs. Other comments were  
9 related to it being a wasted career, an easy choice, boring and stressful.

10  
11  
12 Positive and negative comments were also grouped by the role of the commentator (Table  
13 2). The majority of positive comments were made by GPSTs, followed by GPs. In contrast  
14 the majority of negative comments were made by hospital clinicians.

### 15 16 17 **Focus Group Study**

18 Thematic analysis of the data revealed details of the comments being made and their  
19 influencing factors, and a model of how they affect trainees emerged (figure 1).

#### 20 21 22 **Nature of the comments**

23 A picture of the spectrum of clinicians’ perceptions of GP, varying from multi-specialists to  
24 “just a GP”, emerged. Within the hospital setting, particularly in the acute specialities, the  
25 job of a GP was viewed as very simple: GPs were perceived as not using or possessing  
26 particular skills that hospital doctors had.

27  
28  
29 *‘GP’s just being very simple, managing very simple things and you’re not going to be*  
30 *using your brain that much, you’re not going to be using your clinical skills that much*  
31 *it’s just talking and talking.’ (Senior Registrar being quoted)*

32  
33 The term “just a GP” was frequently reported when trainees were discussing their career  
34 option with more senior clinicians. Participants also realised that they would even use this  
35 term themselves to describe their future plans. It was linked with the idea that to be a GP  
36 was “a waste”, with GP seen as inferior to hospital specialities and disregarded as a speciality  
37 in its own right:

38  
39  
40 *“you’re too good for GP’ - like that was kind of what he was getting at.”*

41  
42 These perceptions were contrasted comments from other clinicians who had very different  
43 views of being a GP, notably of its variety:

44  
45  
46 *“because you are the main community doctor so you are going to deal with so many*  
47 *different things and so you hold a lot of responsibility”*

#### 48 49 **Factors determining clinicians’ perceptions**

50 A number of key factors emerged that appear to underlie clinicians’ perceptions of GP (see  
51 Figure 1). Some factors were predominantly linked to positive perceptions (previous  
52 exposure and experience of GP, family members who were GPs, GP role models), some  
53 were linked to both positive and negative perceptions (age and speciality of clinician) and  
54 others to predominantly negative perceptions (lone working, uncertain future, referral  
55 behaviour).

Figure 1:

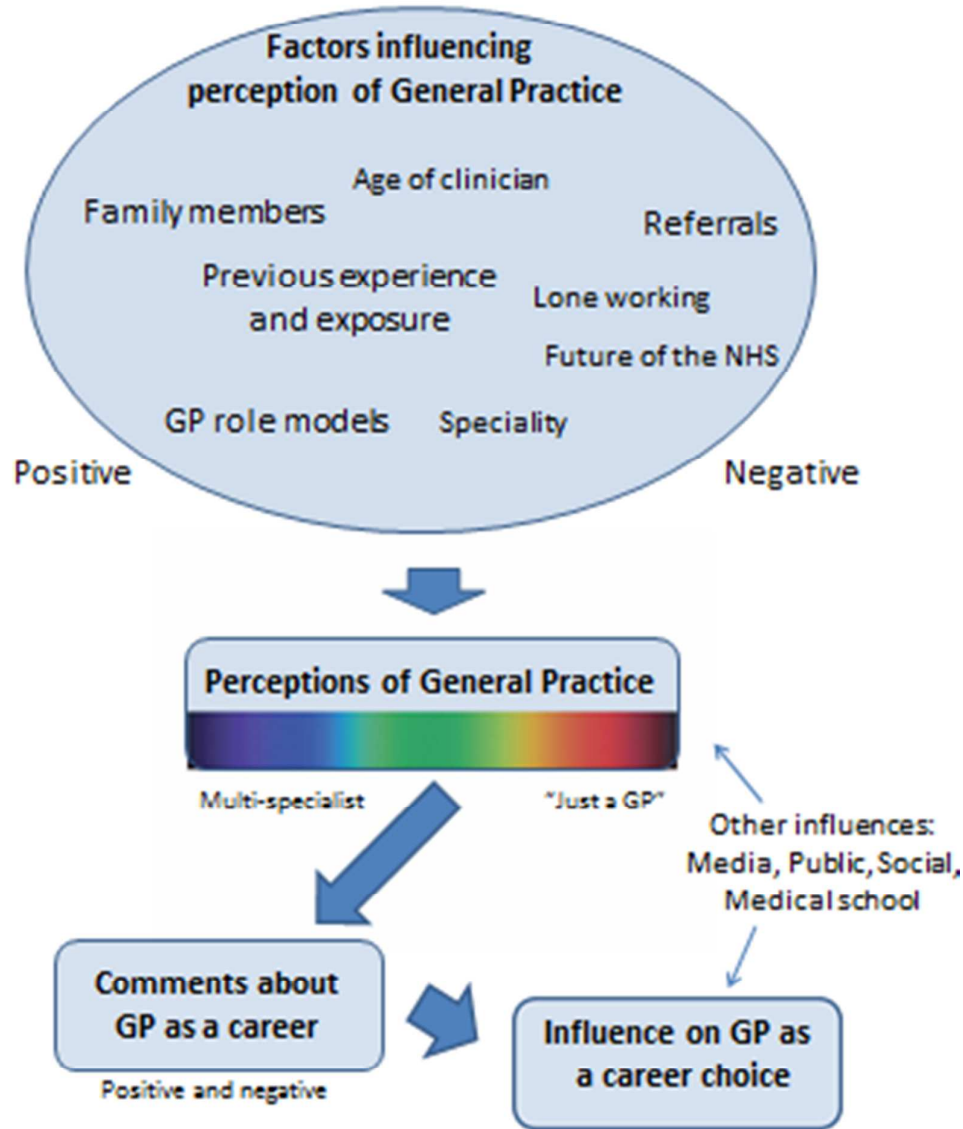

Previous experience and exposure

Previous exposure to GP, particularly as a FD and medical student, emerged as a predominantly positive influencing factor in selecting GP as a career and influencing clinicians' perceptions of GP:

1  
2  
3 *"I think everyone should do a foundation rotation in GP, everybody. I think it will help*  
4 *not only people decide if they like it and what to do. but also () having consultants ()*  
5 *understand what GPs actually do."*  
6

7 *"it's the people who have of no experience of it, you know personally, or links to it*  
8 *that then give the negative"*  
9

### 10 Family members

11  
12 Several participants noted the influence of friends and family members who were GPs on  
13 their career choice, but also highlighted the influence of this on hospital doctors' likelihood  
14 to make positive or negative comments:  
15

16  
17 *"And asking for a reference from a consultant whose wife is a GP for GP training, 'ah*  
18 *yes I'd be delighted to give you a reference, it's excellent that you're going to do GP';*  
19 *But I think that's coming from his understanding of what it involves"*  
20

### 21 GP role models

22  
23 GP role models were reported as consistently positive factors, influencing participants  
24 and other clinicians' perceptions of GP:  
25

26 *"So I think role models is what changes perception, we need people to stand up and*  
27 *help change things"*  
28

### 29 Age and speciality of clinicians

30  
31 Differences in speciality, age and stage of clinicians was noted by participants to determine  
32 the nature of comments made. Predominantly acute specialities were quoted as making  
33 negative comments and older hospital consultants were perceived as more likely than  
34 younger registrars to make negative comments:  
35

36  
37 *"working in A&E I've had the whole 'you're wasted in GP'"*  
38

39 *"I think it's that old school kind of consultants who would never have done a GP job*  
40 *in the foundation program training who therefore think things aren't as they are"*  
41

### 42 Lone working and uncertain future

43  
44 Some participants quoted comments from hospital clinicians who perceived GP to be lonely  
45 work, without a team, as in the secondary care setting:  
46

47 *"that for a sociable person GP is a lonely job and people would say that as a negative*  
48 *thing"*  
49

50  
51 Several participants reported clinicians making negative comments about choosing GP due  
52 to the uncertain future of the NHS:  
53

54 *"anyway my consultant was trying to discourage me from getting onto the GP*  
55 *programme, saying that, it might be appealing now but he doesn't think that things*  
56 *will remain as such in the future"*  
57

### 58 Referral behaviour

1  
2  
3 A further theme that emerged consistently across all focus groups was the relationship  
4 between referral behaviour and perceptions of GP and GPs. Participants described  
5 numerous experiences of hearing Consultants, junior doctors and nurses criticising GPs for  
6 'rubbish' referrals. GPs were criticised for failing to independently manage medical  
7 problems and were seen as frequently referring, mainly to make their own job a lot easier.  
8

9  
10 *'But in my foundation program I felt that, you know, you work in medical admissions*  
11 *so not even in A&E and it's like well this is a rubbish referral from the GP, this GP is*  
12 *obviously crap.'*  
13

14 *"this is an inappropriate referral - GP's are rubbish': you get that almost I think in*  
15 *every job I've done as a hospital doctor and before that when I worked as a midwife*  
16 *or as a nurse"*  
17

### 18 **Influence on career choice**

19  
20 All participants were current GP trainees, therefore any negative comments experienced  
21 had not deterred them from choosing GP. However, some participants reported being  
22 initially influenced away from a career in GP:  
23

24  
25 *"I always wanted to do GP in medical school but then when I got to F1 I sort of, you*  
26 *know fell out of love with it a little bit, I think part of that was because there's so*  
27 *much GP bashing around F1s and in hospital"*  
28

29  
30 *"I think one of the reasons why I didn't just apply for GP straight out was because the*  
31 *people, the medics that I was with were saying, well you'd be wasted you should be*  
32 *doing medicine ... and they tipped me away from where I've actually ended up, if*  
33 *that makes sense"*  
34

35 Most participants felt that their colleagues who were undecided about GP training could  
36 potentially be dissuaded.

37  
38 *"But I can imagine someone who is half and half with a constant barrage of these*  
39 *sort of tongue in cheek comments might you know change their mind"*  
40

### 41 **Other influences**

42  
43 Our study was explicitly focussed on the influence of comments made by clinicians towards  
44 a career in GP but, not surprisingly given the multifaceted and complex nature of career  
45 choice, other potential influences on career choice emerged from the analysis.  
46

47 Badmouthing of GP on social media, television, and in newspapers, was brought up by  
48 participants: They reported a lack of awareness of what the job of a GP entails from the  
49 general public's perspective:  
50

51  
52 *"Also everything in the press, not just now but over the last however many years,*  
53 *there is a lot in the press about GP's and missing this missing that and*  
54 *misrepresentation and I think that as well does impact on people's perception"*  
55

56 The lack of exposure to GP throughout medical school and the Foundation programme were  
57 raised by many participants as potential negative influencing factors. Experience at medical  
58  
59  
60

1  
2  
3 school varied but the predominant message was that GP was seen as a second class and  
4 second choice career:  
5

6 *'I think that's really difficult in medical school because you spend so little time in*  
7 *general practice or based in general practice ... and that kind of just influences your*  
8 *choice as to whether you actually really want to be a GP or not.'*  
9

10 *"It is even at the beginning when they say 'so who here wants to do this or whatever*  
11 *and you've got a lecture of 300 and they say 'so the study showed that 50% of you*  
12 *are going to be GP's, how many of you are' and like... hands up not very many and*  
13 *they go 'ha ha' and it seems like a bit of a joke somehow"*  
14  
15

## 16 **Discussion**

17  
18 Our study corroborates anecdotal evidence of denigration of GP in clinical settings within the  
19 UK and suggests the need to work towards a "zero tolerance" of undermining of career  
20 choice. It also reveals several underlying factors influencing the perception of GP and thus,  
21 the likelihood of clinicians making negative, and positive, comments about GP as a career  
22 choice.  
23  
24

### 25 **Quantity of negative and positive comments**

26  
27 The predominance of positive comments is striking and the relative low proportion of  
28 trainees reporting negative comments is lower than might have been expected. It is  
29 important to note that the trainees are only reporting comments made in their previous  
30 placement for GPSTs (6 months) or during Foundation training for FDs (1 or 2 years); some  
31 would argue for a zero tolerance attitude towards undermining, similar to any other form of  
32 discrimination.[3, 21] The larger proportion of negative comments reported by FDs is  
33 particularly concerning given that they are yet to commit to a specialty, whereas the  
34 increased proportion of positive comments to GPSTs may be understandable as these  
35 doctors have already chosen their career path. The nature of the positive comments is also  
36 of interest in this group, as half of the comments were praising the doctor that they would  
37 "make a good GP", rather than praising the specialty. GPSTs perceived this as a positive  
38 comment but it could be argued that this is not necessarily the case. No similar studies have  
39 been reported previously so we are unable to make comparisons, or to comment on  
40 whether a similar number of comments, negative or positive, are being made about other  
41 medical career choices. The majority of negative comments were made by hospital doctors;  
42 there were also negative comments from GPs whereas GPSTs appear to be championing  
43 their specialty.  
44  
45  
46  
47

### 48 **Nature of the comments**

49  
50 Findings from the survey and the focus group triangulate the nature of comments made and  
51 correlate with the limited previous exploratory work in this area.[4, 22, 23, 24] Positive  
52 comments centre around the concept that choosing GP is a positive, family focused choice  
53 which facilitates a good work/life balance, as supported by previous work; [18] paradoxically  
54 this may have a negative impact on career choice by suggesting that GP is less challenging  
55 than other specialties. The frequent negative comments about the workload of GP is  
56 perhaps not surprising given the current context of primary care within the NHS in the  
57  
58  
59  
60

1  
2  
3 UK.[25] More worrying, are the negativethemes around the belief that GP is boring, a waste  
4 of training and a second class career choice.The notion of trainees being “just a GP”has  
5 been highlighted in a recent editorial.[26]Perceived prestige of specialties has been shown  
6 to be an important factor in career choice[27] and other studies have demonstrated  
7 perceived lack of prestige of GP, withjunior doctors portrayingit as a choice for those  
8 unsuccessful in other areas, with talk of “ending up” or “falling back” on GP.[18,28,29]

### 11 **Influencing factors**

12  
13 We have proposed an original model (fig 1) to frame the relationship between the factors  
14 found to influence clinicians’ perceptions of GP, how this relates to the comments they  
15 make and the influence that these can potentially have on trainees’ career choice.This  
16 model maps conceptually within the Theory of Planned Behaviour (Figure 2),[30] a model  
17 used to frame a wide variety of behavioural intentions. Perceptions of General Practice  
18 appear to be key, combined with the impact of subjective norms within clinical contexts;  
19 both primary and secondary care settings. This behavioural model suggests that to tackle  
20 the problem of negative comments about GP as a career choice we need to address both  
21 the factors that influence this perception of GP and the clinical contextual settings, whilst  
22 also addressing individuals’ beliefs that they can change their behaviour.

23  
24  
25 The causative factors that our study suggests are influencing perceptions, and therefore  
26 comments, about GP may be interlinked: Older consultants are suggested in the focus  
27 group study to be more likely to make negative comments suggesting that “tribalism” within  
28 medicine may be less of a problem with the new generation who have had more exposure  
29 to GP as FDsor medical students. Acute specialties may generate more negative comments  
30 due to the link with referral behaviour: specialties in which their increased workload is  
31 perceived to be due to transfer of work from primary care appear more likely to make  
32 negative comments. In contrast,several factors centred around increased understanding of  
33 a GPs’ role, appear to make positive comments more likely: having a GP as a family  
34 member, GP role models and previous exposure to GP. These are all relatively original  
35 findings in the context of the influence they have on perceptions of, and comments about,  
36 GP by clinicians in training settings. Similarly, the portrayal of GP as a lonely career and the  
37 uncertain future of the NHS appear to be influencing factors that are worth confirming and  
38 exploring further.

39  
40  
41 A crucial question is whether denigration of GP does influence career decisions, given that  
42 this “friendly banter”, as it sometimes portrayed,[20] is not a new phenomenon.[13]  
43 Narratives from our trainees would suggest that the answer is clearly in the affirmative,  
44 which would support suggestions from previous studies in other contexts.[4,9]

### 48 **Strengths and Limitations**

49  
50 Our multi-method study provides triangulation of our findings from two contrasting sources.  
51 The high response rate in the survey and relatively large number of participants in the focus  
52 group study supports the validity and trustworthiness of the findings. Although the results  
53 are from one region of the United Kingdom only, there is no theoretical reason why they  
54 would not be generalisable, certainly across England, and probably the UK. There are some  
55 limitations of the study, one being participant recall. We would suggest prospective studies  
56 be undertaken of comments made to medical students and/or trainees. Focus  
57  
58  
59  
60



1  
2  
3 group participants were GPSTs and we were therefore not able to determine whether any  
4 potential applicants to GP training had truly been dissuaded due to negative comments.  
5

### 6 **Implications**

7  
8 Our study has a number of important implications for medical schools, General Practices,  
9 Secondary care trusts, HEE and the UK NHS as a whole. Most urgently, we have  
10 demonstrated that negative comments about GP as a career are being made to trainees in  
11 clinical settings and trainees' perceptions are that these comments do influence career  
12 choice. Undermining of GP, and we would extend this to "tribalism" within the medical  
13 workforce in general, must be addressed urgently and cohesively within the NHS and  
14 training facilities with a "zero tolerance" policy. We would highly endorse the  
15 recommendations of the HEE/MSc report within medical schools and extend this to all  
16 clinical and postgraduate training settings to tackle undermining of GP as a career choice.[8]  
17  
18

19  
20 Our explanatory model (figure 1) would suggest that influencing the factors that lead to  
21 individuals' perception of GP, and the clinical contextual settings in which they work, would  
22 potentially address the problem of negative comments about GP as a career choice. In  
23 addition, increasing time spent in GP as a medical student and FD, with positive role  
24 modelling, would appear to increase the likelihood of trainees becoming GPs.[31, 32] The  
25 move to a single GMC Specialty Register and title of 'consultant in primary or community  
26 care' may also improve the prestige and respect of GPs amongst their colleagues.[26] Finally,  
27 there also appears to be work that GPs can do themselves to raise the profile of their  
28 discipline, such as avoiding making undermining comments of their own career.[26]  
29  
30

### 31 **Further work/Conclusion**

32  
33 We would strongly recommend that further explorative work and quantitative surveys are  
34 undertaken to explore the extent to which our findings are confirmed nationally and to  
35 confirm to what extent they are discouraging students and trainees from following a career  
36 in GP. We have hypothesised an original model, based on motivational theory, to explore  
37 the influence of comments made and would recommend that this model be tested in other  
38 clinical contexts to confirm and build on our findings. In addition, we would recommend  
39 that work be undertaken to explore undermining of hospital medicine by GPs and other  
40 clinicians. Badmouthing of all specialities, including GP, whether in the primary or  
41 secondary care setting, must be addressed and confronted as a discriminatory issue.  
42  
43  
44  
45  
46  
47  
48  
49  
50  
51  
52  
53  
54  
55  
56  
57  
58  
59  
60

## References

- 1 General Practice National Recruitment Office. Recruitment Figures 2015: General Practice ST1. Available at: <https://gprecruitment.hee.nhs.uk/Portals/8/Documents/Annual%20Reports/GP%20ST1%20Recruitment%20Figures%202015.pdf?ver=2015-12-18-140824-470> (Accessed: April 2017).
- 2 NHS England. General Practice Forward View, 2016. Available at: <https://www.england.nhs.uk/wp-content/uploads/2016/04/gpfv.pdf> (Accessed: April 2017).
- 3 Baker M, Wessely S, Openshaw D. Not such friendly banter? GPs and psychiatrists against the systematic denigration of their specialties. *Br J Gen Pract* 2016;66(651):508–9. doi:10.3399/bjgp16X687169
- 4 Ajaz A, David R, Brown D, et al. BASH: Badmouthing, attitudes and stigmatisation in healthcare as experienced by medical students. *BJPsych Bull* 2016;40(2):97–102. doi:10.1192/pb.bp.115.053140
- 5 Lambert TW, Smith F, Goldacre MJ. Trends in attractiveness of general practice as a career: surveys of views of UK-trained doctors. *Br J Gen Pract* 2017;67(657):e238–e247. doi: <https://doi.org/10.3399/bjgp17X689893>
- 6 Ibrahim M, Fanshawe A, Patel V, et al. What factors influence British medical students' career intentions? *Med Teach* 2014;36(12):1064–1072.
- 7 Querido SJ, Vergouw D, Wigersma L, et al. Dynamics of career choice among students in undergraduate medical courses. A BEME systematic review: BEME Guide No. 33. *Med Teach* 2016;38(1):18–29
- 8 Wass V. By choice — not by chance: supporting medical students towards future careers in general practice. London: Health Education England and the Medical Schools Council, 2016. <https://www.hee.nhs.uk/sites/default/files/documents/By%20choice%20not%20by%20chance%20web%20FINAL.pdf> (accessed April 2017)
- 9 Hunt DD, Scott C, Zhong S, et al. Frequency and effect of negative comments (“badmouthing”) on medical students' career choices. *Acad Med* 1996;71(6):665–9. doi:10.1097/00001888-199606000-00022
- 10 Holmes D, Tumiel-Berhalter L, Zayas L, et al. “Bashing” of Medical Specialties: Students Experiences and Recommendations. *Fam Med* 2008;40(6):400–6.
- 11 Shafer, S, Shore W, French L, et al. Rejecting Family Practice: Why Medical Students Switch to Other Specialties. *Fam Med* 2000;32(5):320–5.
- 12 Stephens M, Lennon C, Durning S, et al. Professional Badmouthing: Who Does It and How Common Is It? *Fam Med* 2010;42(6):388–90.
- 13 Brooks JV. Hostility during training: Historical roots of primary care disparagement. *Ann Fam Med* 2016;14(5):446–52. doi:10.1370/afm.1971

- 1  
2  
3 14 Phillips SP, Clarke M. More than an education: The hidden curriculum, professional attitudes and  
4 career choice. *Med Educ* 2012;46(9):887–93. doi:10.1111/j.1365-2923.2012.04316.x  
5  
6 15 Pianosi K, Bethune C, Hurley KF. Medical student career choice: A qualitative study of fourth-year  
7 medical students at memorial university, Newfoundland. *CMAJ Open* 2016;4(2):e147–52.  
8 doi:10.9778/cmajo.20150103  
9  
10 16 Tolhurst H, Stewart M. Becoming a GP – a qualitative study of the career interests of medical  
11 students. *Aust Fam Physician* 2005;34:204–6.  
12  
13 17 Erikson CE, Danish S, Jones K C, et al. The role of medical school culture in primary care career  
14 choice. *Acad Med* 2013;88(12):1919–26. doi:10.1097/acm.0000000000000038  
15  
16 18 Nicholson S, Hastings AM, McKinley RK. Influences on students' career decisions concerning  
17 general practice: A focus group study. *Br J Gen Pract* 2016 66(651):e768-75.  
18 doi:10.3399/bjgp16x687049  
19  
20 19 Alberti H, Merritt K. Confronting the bashing: Fundamental questions remain. *Br J Gen Pract*  
21 2016;66(653):604–5. doi:10.3399/bjgp16x688081  
22  
23 20 Braun V, Clarke V. Using thematic analysis in psychology. *Qual Res Psychol* 2006;3(2):77-101. doi:  
24 http://dx.doi.org/10.1191/1478088706qp063oa  
25  
26 21 McDonald P, Jackson B, Alberti H, et al. How can medical schools encourage students to choose  
27 general practice as a career? *Br J Gen Pract* 2016;66(647):292–3. doi:10.3399/bjgp16x685297  
28  
29 22 Edgcumbe DP, Lillicrap MS, Benson JA. A qualitative study of medical students' attitudes to  
30 careers in general practice. *Educ Prim Care* 2008;19(1):65–73.  
31 doi:10.1080/14739879.2008.11493651  
32  
33 23 Evans J, Lambert T, Goldacre M. GP recruitment and retention: a qualitative analysis of doctors'  
34 comments about training for and working in general practice. *Occas Pap R Coll Gen Pract*  
35 2002;83(iii–vi):1–33.  
36  
37 24 Firth A, Wass V. Medical students' perceptions of primary care: The influence of tutors, peers and  
38 the curriculum. *Educ Prim Care* 2007;18(3):364–72. doi:10.1080/14739879.2007.11493562  
39  
40 25 Royal College of General Practitioners. Patient safety implications of general practice workload,  
41 2015. Available at: <http://www.rcgp.org.uk/policy/rcgp-policy-areas/fatigue-in-general-practice.aspx>  
42 (Accessed: April 2017).  
43  
44 26 Wass V, Gregory S. Not 'just' a GP: a call for action. *Br J Gen Pract* 2017;67(657):149-149.  
45  
46 27 Curtis-Barton MT, Eagles JM. Factors that discourage medical students from pursuing a career in  
47 psychiatry. *Psychiatrist* 2011;35(11):425–9. doi:10.1192/pb.bp.110.032532  
48  
49 28 Petchey R, Williams J, Baker, M. 'Ending up a GP': a qualitative study of junior doctors'  
50 perceptions of general practice as a career. *Fam Pract* 1997;14(3):194-8.  
51  
52  
53  
54  
55  
56  
57  
58  
59  
60

1  
2  
3 29 Merrett A, Jones D, Sein K, et al. Attitudes of newly qualified doctors towards a career in general  
4 practice: a qualitative focus group study. *Br J Gen Pract* 2017;67(657):e253-9.  
5 doi:10.3399/bjgp17X690221  
6

7  
8 30 Ajzen I. From intentions to action: A theory of planned behavior. In Kuhl J, Beckman J, eds *Action-*  
9 *control: From cognition to behavior*. Heidelberg: Springer 1985:11-39

10  
11 31 Alberti H, Randles HL, Harding A, et al. Exposure of undergraduates to authentic GP teaching and  
12 subsequent entry to GP training: a quantitative study of UK medical schools. *Br J Gen Pract* 2017;  
13 67(657), pp.e248-e52. doi: <https://doi.org/10.3399/bjgp17X689881>  
14

15  
16 32 Marchand C, Peckham S. Addressing the crisis of GP recruitment and retention: a systematic  
17 review. *Br J Gen Pract* 2017;67(657):e227-e237. doi:10.3399/bjgp17X689929  
18  
19  
20  
21  
22  
23  
24  
25  
26  
27  
28  
29  
30  
31  
32  
33  
34  
35  
36  
37  
38  
39  
40  
41  
42  
43  
44  
45  
46  
47  
48  
49  
50  
51  
52  
53  
54  
55  
56  
57  
58  
59  
60

1  
2  
3 **Appendix one: Information sheet**  
4 **given to focus group participants.**  
5

6 **Project:**A pilot study exploring the  
7 influence of clinical teachers on  
8 trainee application into General  
9 Practice.  
10

11 **Interviewers:**Dr. Joanna Hall.  
12

13  
14 Dr .KymberleeMerritt  
15 kmerritt@nhs.net  
16

17  
18 **Lead researcher:**  
19 hugh.alberti@ncl.ac.uk  
20

21 **Information Sheet**  
22

23  
24 Thank you for taking the time to  
25 read this information sheet.  
26

27  
28 Our names are Dr. Joanna Hall and  
29 Dr.Kymberlee Merritt and we are a  
30 GP and a GP traineeworking with Dr  
31 Hugh Alberti, Sub Dean for primary  
32 care at Newcastle University.  
33

34  
35 **What is the study about?**  
36

37 *Difficulty recruiting trainees into GP training programmes at both local and national level*  
38 *represents a significant problem for NHS workforce planning. One factor thought to*  
39 *influence career choice is verbalised opinions from clinical teachers.. The study will explore*  
40 *comments, both negative and positive that were made to GP trainees about their choice of*  
41 *General Practice as a career, both as medical students and when they were foundation*  
42 *doctors. We will discuss whether these comments influenced career choice.*  
43  
44

45 **Why is the study being done?**  
46

47 This study is being carried out to explore the influences that may affect medical student and  
48 foundation doctor career choices. The study is being carried out in order to improve GP  
49 trainee recruitment.  
50

51  
52 **What does taking part in the study involve?**  
53

54 *The study will involve being part of a focus group where we will have discussions regarding*  
55 *any comments made to GP trainees whilst they were medical students or Foundation doctors*  
56 *about a career choice in General Practice. The focus groups will follow a semi structured*  
57  
58  
59  
60

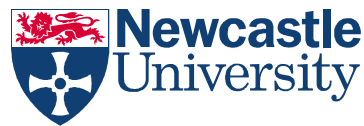

School of Medical Education

Medical School

Newcastle University

NE2 4HH

1  
2  
3 *interview format. Interviews will be digitally recorded and professionally transcribed. Results*  
4 *will be analysed using thematic analysis.*  
5

6 **What if I decide I do not want to take part in the study, or I want to pull out once it has started?**  
7

8  
9 You are free to decline to be interviewed and free to withdraw from the study at any time.  
10

11 **What about confidentiality?**  
12

13 The interview will be kept strictly confidential and will be available only to ourselves and the  
14 research team. Excerpts from the interview may be made part of the final research report, but under  
15 no circumstances will your name or any identifying characteristics be included in the report.  
16  
17  
18  
19  
20  
21  
22  
23  
24  
25  
26  
27  
28  
29  
30  
31  
32  
33  
34  
35  
36  
37  
38  
39  
40  
41  
42  
43  
44  
45  
46  
47  
48  
49  
50  
51  
52  
53  
54  
55  
56  
57  
58  
59  
60

**Appendix two: Consent form for focus group participants**

**Project:**A pilot study exploring the influence of clinical teachers on trainee application into General Practice.

**Interviewers** Dr. Joanna Hall, Dr.Kymerlee Merritt

**Lead researcher:**hugh.alberti@ncl.ac.uk

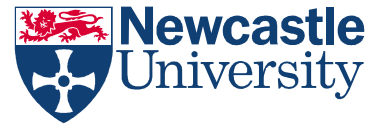

**School of Medical Education**

MedicalSchool

NewcastleUniversity

NE2 4HH

**Consent Form**

- I confirm that I have read and understood the Information Sheet.
- I confirm that the study has been explained to my satisfaction and I have had a chance to ask questions.
- I know who to contact if I have any questions later.
- I understand participation is voluntary and that I can withdraw at any time without giving a reason.
- I understand that the focus group/interview, both the recording and the typed copy, will be held confidentially.
- I agree to anonymised excerpts of my interview being used in research publication.
- I agree to take part.

Name of Participant .....

Signature of Participant .....

Date .....

Name of Researcher .....

Signature of Researcher .....

Date .....

# BMJ Open

## "Just a GP": A mixed method study of undermining of General Practice as a career choice in the UK

|                                 |                                                                                                                                                                                                                                                                                      |
|---------------------------------|--------------------------------------------------------------------------------------------------------------------------------------------------------------------------------------------------------------------------------------------------------------------------------------|
| Journal:                        | <i>BMJ Open</i>                                                                                                                                                                                                                                                                      |
| Manuscript ID                   | bmjopen-2017-018520.R1                                                                                                                                                                                                                                                               |
| Article Type:                   | Research                                                                                                                                                                                                                                                                             |
| Date Submitted by the Author:   | 10-Sep-2017                                                                                                                                                                                                                                                                          |
| Complete List of Authors:       | Alberti, Hugh; Newcastle University, School of Medical Education<br>Banner, Kimberley; Newcastle University, School of medical education<br>Collingwood, Helen; Newcastle University, School of Medical Education<br>Merritt, Kym; Newcastle University, School of medical education |
| <b>Primary Subject Heading</b>: | General practice / Family practice                                                                                                                                                                                                                                                   |
| Secondary Subject Heading:      | General practice / Family practice, Medical education and training, Qualitative research                                                                                                                                                                                             |
| Keywords:                       | EDUCATION & TRAINING (see Medical Education & Training), PRIMARY CARE, QUALITATIVE RESEARCH                                                                                                                                                                                          |
|                                 |                                                                                                                                                                                                                                                                                      |

SCHOLARONE™  
Manuscripts



1  
2  
3  
4  
5  
6  
7  
8  
9  
10  
11  
12  
13  
14  
15  
16  
17  
18  
19

## **“Just a GP”: A mixed method study of undermining of General Practice as a career choice in the UK**

20 Hugh Alberti, Kimberley Banner, Helen Collingwood, Kymberlee Merritt

21 Hugh Alberti.

22 Subdean for Primary and community care, Newcastle university.

23 Newcastle School of Medical Education, The Faculty of Medical Sciences, Cookson Building,  
24 Newcastle University, NE2 4HH  
25  
26

27 Kimberley Banner

28 GP Speciality Trainee, Durham Tees Valley GP training programme.

29 Health Education North East Lead Employer Trust, Waterfront, 4 Goldcrest Way, Newburn  
30 Riverside, Newcastle Upon Tyne, NE15 8NY  
31  
32

33 Helen Collingwood

34 GP Speciality Trainee, Durham Tees Valley GP training Programme

35 Health Education North East Lead Employer Trust, Waterfront, 4 Goldcrest Way, Newburn  
36 Riverside, Newcastle Upon Tyne, NE15 8NY  
37  
38

39 Kymberlee Merritt

40 GP Speciality Trainee, Durham Tees Valley GP training programme.

41 Health Education North East Lead Employer Trust, Waterfront, 4 Goldcrest Way, Newburn  
42 Riverside, Newcastle Upon Tyne, NE15 8NY  
43  
44

45  
46 Correspondence to: Kimberley Banner, [Kimberley.banner@gmail.com](mailto:Kimberley.banner@gmail.com)  
47  
48  
49  
50  
51  
52  
53  
54  
55  
56  
57  
58  
59  
60

### Copyright/licence for publication

*“The Corresponding Author has the right to grant on behalf of all authors and does grant on behalf of all authors, [a worldwide licence](#) to the Publishers and its licensees in perpetuity, in all forms, formats and media (whether known now or created in the future), to i) publish, reproduce, distribute, display and store the Contribution, ii) translate the Contribution into other languages, create adaptations, reprints, include within collections and create summaries, extracts and/or, abstracts of the Contribution, iii) create any other derivative work(s) based on the Contribution, iv) to exploit all subsidiary rights in the Contribution, v) the inclusion of electronic links from the Contribution to third party material where-ever it may be located; and, vi) licence any third party to do any or all of the above.”*

### Competing interests' statement

We have read and understood BMJ policy on declaration of interests and declare that we have no competing interests. All authors have completed the ICMJE uniform disclosure form at [www.icmje.org/coi\\_disclosure.pdf](http://www.icmje.org/coi_disclosure.pdf). All Authors declare that we have no support from any organisation for the submitted work; no financial relationships with any organisations that might have an interest in the submitted work in the previous three years, no other relationships or activities that could appear to have influenced the submitted work.

Funding for transcription and the cost of focus groups was provided by the Faculty of Medical Sciences at Newcastle University.

### Guarantor and Contributors

The study proposal was proposed by Hugh Alberti and developed jointly by Hugh Alberti, Kimberley Banner, Helen Collingwood and Kymberlee Merritt. The focus groups were undertaken by Hugh Alberti and Kymberlee Merritt and analysed by Hugh Alberti and Kymberlee Merritt. The survey data was analysed by Helen Collingwood and Kimberley Banner. The paper was written by all authors jointly and all authors approved the final version of the paper.

The guarantor for this paper is Hugh Alberti. Dr Alberti affirms that the manuscript is an honest, accurate, and transparent account of the study being reported; that no important aspects of the study have been omitted; and that any discrepancies from the study as planned have been explained.

### Acknowledgements

Thanks to the Faculty of Medical Sciences at Newcastle University for funding the focus group study. Thanks to the Postgraduate Primary Care School and Foundation School at Health Education England (across the Northeast and North Cumbria) for collecting the questionnaire evaluation data, and for funding the GP speciality trainees undertaking an education attachment, to the Durham tees Valley and Northumbria Training Programmes for facilitating access to the General Practice speciality trainees and the participating trainees for their time. Thanks also to Jo Hall for her early help in the project and to Alison Bonavia and Bob Mckinley for advice on drafts of the manuscript.

### Ethics Approval

1  
2  
3 Ethics approval granted by Newcastle University Ethics approval committee.  
4

5 Ethics Approval application number: 00911/2015  
6

7 Appendices containing consent and information sheets regarding the Ethics approval for this  
8 study have been uploaded alongside this document (Appendix one, Appendix two).  
9

10 Survey data from routine programme evaluation data, which has been anonymised.  
11 Appendices containing further information given to focus group participants can be found at  
12 the end of the document.  
13

#### 14 **Data Sharing Statement** 15

16 Additional unpublished data, quotes from focus groups and survey questions which have  
17 not been included in the paper, can be requested via the corresponding author.  
18  
19  
20  
21  
22  
23  
24  
25  
26  
27  
28  
29  
30  
31  
32  
33  
34  
35  
36  
37  
38  
39  
40  
41  
42  
43  
44  
45  
46  
47  
48  
49  
50  
51  
52  
53  
54  
55  
56  
57  
58  
59  
60

# **“Just a GP”: A mixed method study of undermining of General Practice as a career choice in the UK**

## **Abstract**

### Objectives

Failure to recruit sufficient applicants to General Practice training has been a problem both nationally and internationally for many years and undermining of GP is one possible contributing factor. The aim of our study was to ascertain what comments, both negative and positive, are being made in UK clinical settings to GP trainees about GP and to further explore these comments and their influence on career choice.

### Methodology

We conducted a mixed methods study. We surveyed all Foundation Doctors and General Practice trainees within one region of HEE regarding any comments they experienced relating to a career in General Practice. We also conducted six focus groups with early GP trainees to discuss any comments that they experienced and whether these comments had any influence on their or others career choice.

### Results

Positive comments reported by trainees centred around the concept that choosing GP is a positive, family focused choice which facilitates a good work/life balance. Workload was the most common negative comment, alongside the notion of being “just a GP”; the belief that GP is boring, a waste of training and a second-class career choice. The reasons for, and origin of the comments are multifactorial in nature. Thematic analysis of the focus groups identified key factors such as previous exposure to and experience of GP, family members who were GPs, GP role models, demographics of the clinician and referral behaviour. Trainees perceived that negative comments may be discouraging others from choosing General Practice as a career.

### Conclusion

Our study demonstrates that negative comments towards GP as a career do exist within clinical settings and are having a potential impact on poor recruitment rates to General Practice training. We have identified areas in which further negative comments could be prevented by changing perceptions of GP as a career. Additional time spent in General practice as undergraduates and postgraduates, and positive GP role models, could particularly benefit recruitment. We recommend that undermining of General Practice as a career choice be approached with a zero-tolerance policy.

## **Article Summary**

Strengths and limitations of this study:

- Qualitative and quantitative data from both focus groups and end of year survey data.
- Responses gained from trainees in Foundation year two and General Practice speciality training.
- Surveys and focus groups all rely on retrospective narratives from Junior doctors therefore time since an experience may reduce the reliability of this data.
- Focus groups of GP Trainees at the start of their training and further research may be needed into how experiences change throughout training.

- No data gathered from the medical student population and further research needed in order to see if denigration of general practice is a problem in this group.

## Introduction

General Practice recruitment is of increasing concern internationally. Recent efforts to improve recruitment in the UK have resulted only in slight improvement with training places left unfilled in some regions.[1]These low recruitment levels are in the context of the pledge to increase General Practice (GP) training recruitment, with the target of 50% of postgraduate medical training places being allocated to GP.[2]However, the proportion of UK medical graduates intending to enter GP is well below this target, with the proportion reducing rather than increasing.[3, 4, 5]

It of paramount importance, therefore, to address barriers to recruitment and explore the factors that impact on medical students' and foundation doctors' career aspirations. Career choice intentions of medical students is a complex issue with multiple modifiable and non-modifiable factors reported, such as exposure to specialty, role models, financial reward, prestige and workload.[6, 7] The situation around General Practice as a career choice is similarly complex and includes pre-training perceptions, medical school influences and postgraduate factors.[8]

One area rarely addressed until recently is the issue of undermining of career choices. It has been suggested, based predominantly on anecdotal evidence, that negative comments made to students and trainees may influence career choices. A notable exception was a recent survey of medical students who reported that psychiatry and GP attracted the greatest number of negative comments, which were made by academic staff, doctors and students. This supports a recent report by Health Education England and the Medical Schools Council (HEE/MSC)on raising the profile of GP at medical schools that stated explicitly amongst its recommendations: "Work should take place to tackle undermining of GP as a career across all medical school settings including primary care".[8]

Denigration of GP has been studied more extensively internationally within other contexts. Analysis of data from the United States has demonstrated fairly high levels of discouragement about, or denigration of primary care, through five decades.[9, 10, 11, 12, 13] Similarly, Canadian medical students report particular denigration of family doctors and a general feeling of lack of respect between specialities[14, 15]and Australian students report poor status of GP to be a particular negative factor in relation to future career choice.[16]

Study of the denigration of GP in the UK has been limited to focusing on career intention [9, 14,17, 18]and many questions remain unanswered.[19]Firstly, what comments, both negative or indeed positive, are being made by clinicians about GP as a career choice? Secondly, why are comments being made, i.e. what are the factors underlying these comments? And thirdly, how do the comments influence the eventual career choice of potential General Practitioners? Thus, the aim of our study was to ascertain what comments, both negative and positive, are being made in clinical settings to trainees about GP and to explore these comments and their perceived influence on career choice with trainees who have chosen a career in GP. To our knowledge, no studies previously have

sought to address these aims using qualitative and quantitative methods, in the UK or indeed internationally.

## **Method**

We undertook a mixed method study, incorporating both quantitative and qualitative methods, to address the research questions. Although not without its critics,[20] we agree with Bryman and others that there is utility and validity in combining both quantitative and qualitative methods in one study.[21,22]

We asked all Foundation Doctors (FDs) and General Practice Specialty Registrars (GPSTs) within one Health Education England (HEE) region about comments that they had received regarding GP as a career option, within a pre-existing online, end of post evaluation survey. FDs in the UK are one and two years post-graduation and GPSTs are at least three years post-graduation, some having many more years of experience prior to commencing GP training. Two reminders were sent to trainees to complete the surveys. The following questions were asked:

- FDs: “So far in your foundation training have you received any specific comments, either positive or negative, regarding GP as a career option? If so, please describe the exact nature of the comments and by whom they were made”. This was asked within the annual, regional FD survey in mid-2016 towards the end of their Foundation Year 1 or 2.
- GPSTs: “In this post have you had any specific comments made, either positive or negative, about your choice of career to be a General Practitioner? Please provide the exact nature of the comments and by whom they were made”. This was asked within their End of Post Feedback Survey in July 2016 (following completion of a 6 month GP or Hospital Training Post).

Comments were reviewed by the research team and classified as negative, positive or mixed. Where classification was unclear or ambiguous, the comments were classified as mixed. A descriptive analysis was undertaken grouping the themes depending on their nature and source, and the number and proportion of comments were presented.

### **Focus groups**

We undertook six focus groups with GPSTs from the two largest GP training programs in one HEE region. Focus group interviews were conducted by members of the research team using a semi-structured interview format to allow participants to elaborate on their experiences. Focus group interviews varied in size from three to fourteen participants with an average size of eight (total number of participants = 49). Each interview lasted approximately 40 minutes and were digitally recorded and professionally transcribed verbatim. Two researchers checked the transcripts in order to confirm the accuracy of transcriptions and to ensure that sufficient participant discussion had taken place, with minimal input from the researcher, allowing rich, authentic data to be captured. Participants were asked to describe and recall any comments made to them by primary or secondary care clinicians, at any point in their training, regarding a career choice of GP. They were asked to expand on the comments and discuss similar or contrasting experiences, and

whether they felt that the comments had affected their career choice in any way. Thematic analysis, based on the model outlined by Braun and Clarke [23] was carried out by two members of the research team using a mixed deductive and inductive approach. Participants were fully consented and approval was granted by the University Faculty ethical board.

## Results

### Survey results

There were 780 responses to the survey from 839 FDs (response rate=93%). 232 (30%) FDs reported having received comments about GP as a career choice. 91 FDs reported positive comments (12% of responders), 50 reported negative comments (6%) and 56 reported both positive and negative comments (7%).

There were 343 responses to the GPST end of post evaluation from 399 trainees (response rate=86%). 138 (40%) GPSTs reported comments during their previous six-month post. 115 trainees reported positive comments (33% of responders), 15 reported negative comments (4%) and 8 reported both positive and negative comments (2%).

**Table 1: Comments about GP as a career by theme**

|                                 | Theme                               | n (FD)   | % (FD)* | n (GPST) | % (GPST)* |
|---------------------------------|-------------------------------------|----------|---------|----------|-----------|
| <b>Positive</b>                 | Work life balance                   | 20       | 30%     | 14       | 23%       |
|                                 | Good training programme             | 16       | 24%     | 5        | 8%        |
|                                 | Variety                             | 6        | 9%      | 5        | 8%        |
|                                 | Special interests                   | 4        | 6%      | -        | -         |
|                                 | Recruitment crisis- easy to get job | 4        | 6%      | 2        | 3%        |
|                                 | Flexible                            | 4        | 6%      | 1        | 2%        |
|                                 | Continuity of Care                  | -        | -       | 3        | 5%        |
|                                 | Less stress                         | 1        | 2%      | -        | -         |
|                                 | Lifestyle                           | 1        | 2%      | -        | -         |
|                                 | Short training                      | 1        | 2%      | -        | -         |
|                                 | Pay                                 | -        | -       | 1        | 2%        |
|                                 | Holistic                            | -        | -       | 1        | 2%        |
|                                 | <b>Negative</b>                     | Workload | 25      | 34%      | 2         |
| A waste                         |                                     | 6        | 8%      | 3        | 14%       |
| “Easy choice”                   |                                     | 5        | 7%      | 4        | 18%       |
| Boring                          |                                     | 6        | 8%      | 2        | 9%        |
| Stress                          |                                     | 6        | 8%      | 2        | 9%        |
| Bad referrals                   |                                     | 6        | 8%      | -        | -         |
| Paperwork                       |                                     | 3        | 4%      | 1        | 5%        |
| Why be a GP?                    |                                     | 1        | 1%      | 3        | 14%       |
| Trivial patient problems        |                                     | -        | -       | 3        | 14%       |
| A few GPs give the profession a |                                     | -        | -       | 2        | 9%        |

|                  |                                        |   |     |    |     |
|------------------|----------------------------------------|---|-----|----|-----|
|                  | bad name                               |   |     |    |     |
|                  | Recruitment crisis                     | 2 | 3%  | -  | -   |
|                  | Training scheme                        | 2 | 3%  | -  | -   |
|                  | Blame environment                      | 2 | 3%  | -  | -   |
|                  | Time constraints                       | 2 | 3%  | -  | -   |
|                  | E-portfolio**                          | 1 | 1%  | -  | -   |
|                  | QOF***                                 | 1 | 1%  | -  | -   |
|                  | Complaints                             | 1 | 1%  | -  | -   |
|                  | "For those who can't do anything else" | 1 | 1%  | -  | -   |
|                  | Media opinion                          | 1 | 1%  | -  | -   |
|                  | Isolating                              | 1 | 1%  | -  | -   |
|                  | Uncertain future                       | 1 | 1%  | -  | -   |
| <b>Ambiguous</b> | "You would make a good GP"             | 9 | 14% | 28 | 47% |

\* Percentages are based on the number of comments reported by that group of trainees; i.e. the denominator is the number of positive or negative comments in total for that group of trainees. Many trainees reported hearing positive and/or negative comments but did not expand further. \*\*E-portfolio: GPSTs in the UK are required to collect evidence of their learning in an e-portfolio. \*\*\*QOF: Quality and Outcomes Framework: A system of performance payment for GPs in the UK.

**Table 2: Comments about GP as a career by commentator**

|                 | Commentator                            | n (FD) | % (FD) | n (GPST) | % (GPST) |
|-----------------|----------------------------------------|--------|--------|----------|----------|
| <b>Positive</b> | GPSTs                                  | 60     | 57%    | 4        | 4%       |
|                 | GPs                                    | 23     | 22%    | 35       | 31%      |
|                 | Consultants                            | 10     | 10%    | 29       | 26%      |
|                 | Junior/middle grade hospital doctors   | 9      | 9%     | 25       | 22%      |
|                 | Nursing staff                          | 1      | 1%     | 7        | 6%       |
|                 | Patients                               | 1      | 1%     | 1        | 1%       |
|                 | Other                                  | -      | -      | 11       | 10%      |
| <b>Negative</b> | Junior/middle grade hospital doctors   | 29     | 39%    | 6        | 22%      |
|                 | Consultants( <b>hospital doctors</b> ) | 20     | 27%    | 8        | 30%      |
|                 | GPs                                    | 11     | 15%    | 3        | 11%      |
|                 | GPSTs                                  | 9      | 11%    | -        | -        |
|                 | Nursing staff                          | 6      | 8%     | 3        | 11%      |
|                 | Patients                               | -      | -      | -        | -        |
|                 | Other (non-clinical staff)             | -      | -      | 7        | 26%      |

\* Percentages are based on the number of comments reported by that group of trainees; i.e. the denominator is the number of positive or negative comments in total for that group of trainees. Many trainees reported hearing positive and/or negative comments but did not expand further.

Table 1 displays the types of comments reported by FD and GPST doctors. The most common types of positive comment were the generic statement "you would make a good GP" (predominantly made to GPSTs; GPSTs perceived this as a positive comment but it could be argued that this is not necessarily the case), work-life balance issues, the view that the GP training programme was good (predominantly made to FDs) and the variety of the job.



1  
2  
3 Workload was the most common negative comment made to FDs. Other comments were  
4 related to it being a wasted career, an easy choice, boring and stressful.  
5

6 Positive and negative comments were also grouped by the role of the commentator (Table  
7 2). The majority of positive comments were made by GPSTs, followed by GPs. In contrast  
8 the majority of negative comments were made by hospital clinicians.  
9

### 10 **Focus Group Study**

11  
12 Thematic analysis of the data revealed details of the comments being made and their  
13 influencing factors, and a model of how they affect trainees emerged (figure 1).  
14

#### 15 **Nature of the comments**

16  
17 A picture of the spectrum of clinicians' perceptions of GP, varying from multi-specialists to  
18 "just a GP", emerged. Within the hospital setting, particularly in the acute specialities, the  
19 job of a GP was viewed as very simple: GPs were perceived as not using or possessing  
20 particular skills that hospital doctors had.  
21

22  
23 *'GP's just being very simple, managing very simple things and you're not going to be*  
24 *using your brain that much, you're not going to be using your clinical skills that much*  
25 *it's just talking and talking.'* (Senior Registrar being quoted)  
26

27  
28 The term "just a GP" was frequently reported when trainees were discussing their career  
29 option with more senior clinicians. Participants also realised that they would even use this  
30 term themselves to describe their future plans. It was linked with the idea that to be a GP  
31 was "a waste", with GP seen as inferior to hospital specialities and disregarded as a  
32 speciality in its own right:  
33

34 *"you're too good for GP' - like that was kind of what he was getting at."*  
35

36 These perceptions were contrasted comments from other clinicians who had very different  
37 views of being a GP, notably of its variety:  
38

39 *"because you are the main community doctor so you are going to deal with so many*  
40 *different things and so you hold a lot of responsibility"*  
41

#### 42 **Factors determining clinicians' perceptions**

43  
44 A number of key factors emerged that appear to underlie clinicians' perceptions of GP (see  
45 Figure 1). Some factors were predominantly linked to positive perceptions (previous  
46 exposure and experience of GP, family members who were GPs, GP role models), some  
47 were linked to both positive and negative perceptions (age and speciality of clinician) and  
48 others to predominantly negative perceptions (lone working, uncertain future, referral  
49 behaviour).  
50  
51

#### 52 Previous experience and exposure

53  
54 Previous exposure to GP, particularly as a FD and medical student, emerged as a  
55 predominantly positive influencing factor in selecting GP as a career and influencing  
56 clinicians' perceptions of GP:  
57  
58  
59  
60

1  
2  
3 *"I think everyone should do a foundation rotation in GP, everybody. I think it will help*  
4 *not only people decide if they like it and what to do. but also () having consultants ()*  
5 *understand what GPs actually do."*  
6

7 *"it's the people who have of no experience of it, you know personally, or links to it*  
8 *that then give the negative"*  
9

#### 10 Family members

11  
12 Several participants noted the influence of friends and family members who were GPs on  
13 their career choice, but also highlighted the influence of this on hospital doctors' likelihood  
14 to make positive or negative comments:  
15

16  
17 *"And asking for a reference from a consultant whose wife is a GP for GP training, 'ah*  
18 *yes I'd be delighted to give you a reference, it's excellent that you're going to do GP';*  
19 *But I think that's coming from his understanding of what it involves"*  
20

#### 21 GP role models

22  
23 GP role models were reported as consistently positive factors, influencing participants and  
24 other clinicians' perceptions of GP:  
25

26 *"So I think role models is what changes perception, we need people to stand up and*  
27 *help change things"*  
28

#### 29 Age and speciality of clinicians

30  
31 Differences in speciality, age and stage of clinicians was noted by participants to determine  
32 the nature of comments made. Predominantly acute specialities were quoted as making  
33 negative comments and older hospital consultants were perceived as more likely than  
34 younger registrars to make negative comments:  
35

36  
37 *"working in A&E (Accident and Emergency department) I've had the whole 'you're*  
38 *wasted in GP"*  
39

40 *"I think it's that old school kind of consultants who would never have done a GP job*  
41 *in the foundation program training who therefore think things aren't as they are"*  
42

#### 43 Lone working and uncertain future

44  
45 Some participants quoted comments from hospital clinicians who perceived GP to be lonely  
46 work, without a team, as in the secondary care setting:  
47

48 *"that for a sociable person GP is a lonely job and people would say that as a negative*  
49 *thing"*  
50

51  
52 Several participants reported clinicians making negative comments about choosing GP due  
53 to the uncertain future of the NHS:  
54

55 *"anyway my consultant was trying to discourage me from getting onto the GP*  
56 *programme, saying that, it might be appealing now but he doesn't think that things*  
57 *will remain as such in the future"*  
58  
59  
60

### Referral behaviour

A further theme that emerged consistently across all focus groups was the relationship between referral behaviour and perceptions of GP and GPs. Participants described numerous experiences of hearing Consultants, junior doctors and nurses criticising GPs for 'rubbish' referrals. GPs were criticised for failing to independently manage medical problems and were seen as frequently referring, mainly to make their own job a lot easier.

*'But in my foundation program I felt that, you know, you work in medical admissions so not even in A&E and it's like well this is a rubbish referral from the GP, this GP is obviously crap.'*

*"this is an inappropriate referral - GP's are rubbish': you get that almost I think in every job I've done as a hospital doctor and before that when I worked as a midwife or as a nurse"*

### **Influence on career choice**

All participants were current GP trainees, therefore any negative comments experienced had not deterred them from choosing GP. However, some participants reported being initially influenced away from a career in GP:

*"I always wanted to do GP in medical school but then when I got to F1 I sort of, you know fell out of love with it a little bit, I think part of that was because there's so much GP bashing around F1s and in hospital"*

*"I think one of the reasons why I didn't just apply for GP straight out was because the people, the medics that I was with were saying, well you'd be wasted you should be doing medicine ... and they tipped me away from where I've actually ended up, if that makes sense"*

Most participants felt that their colleagues who were undecided about GP training could potentially be dissuaded.

*"But I can imagine someone who is half and half with a constant barrage of these sort of tongue in cheek comments might you know change their mind"*

### **Other influences**

Our study was explicitly focussed on the influence of comments made by clinicians towards a career in GP but, not surprisingly given the multifaceted and complex nature of career choice, other potential influences on career choice emerged from the analysis.

Badmouthing of GP on social media, television, and in newspapers, was brought up by participants: They reported a lack of awareness of what the job of a GP entails from the general public's perspective:

*"Also everything in the press, not just now but over the last however many years, there is a lot in the press about GP's and missing this missing that and misrepresentation and I think that as well does impact on people's perception"*

1  
2  
3 The lack of exposure to GP throughout medical school and the Foundation programme were  
4 raised by many participants as potential negative influencing factors. Experience at medical  
5 school varied but the predominant message was that GP was seen as a second class and  
6 second choice career:  
7

8  
9 *'I think that's really difficult in medical school because you spend so little time in*  
10 *general practice or based in general practice ... and that kind of just influences your*  
11 *choice as to whether you actually really want to be a GP or not.'*

12  
13 *"It is even at the beginning when they say 'so who here wants to do this or whatever*  
14 *and you've got a lecture of 300 and they say 'so the study showed that 50% of you*  
15 *are going to be GP's, how many of you are' and like... hands up not very many and*  
16 *they go 'ha ha' and it seems like a bit of a joke somehow"*  
17

## 18 **Discussion**

19  
20 Our study has demonstrated that both negative and positive comments are being made to  
21 trainees about a career in GP in the UK and a number of influencing factors have emerged.  
22 Many trainees reported positive comments and a significant minority of FDs (19%), and  
23 GPSTs (6%), reported negative comments. Qualitative analysis revealed a number of factors  
24 that appear to be underlying clinicians' perceptions of GP (see Figure 1): Previous exposure  
25 to and experience of GP, family members who were General Practitioners (GPs), GP role  
26 models, age and specialty of clinician, lone working, the future of the NHS and the influence  
27 of referral behavior.  
28  
29

### 30 **Quantity of negative and positive comments**

31  
32 The predominance of positive comments is striking and the relative low proportion of  
33 trainees reporting negative comments is lower than might have been expected. It is  
34 important to note that the trainees are only reporting comments made in their previous  
35 placement for GPSTs (6 months) or during Foundation training for FDs (1 or 2 years); some  
36 would argue for a zero tolerance attitude towards undermining, similar to any other form of  
37 discrimination.[3, 24] The larger proportion of negative comments reported by FDs is  
38 particularly concerning given that they are yet to commit to a specialty, whereas the  
39 increased proportion of positive comments to GPSTs may be understandable as these  
40 doctors have already chosen their career path. The nature of the positive comments is also  
41 of interest in this group, as half of the comments were praising the doctor that they would  
42 "make a good GP", rather than praising the specialty. GPSTs perceived this as a positive  
43 comment but it could be argued that this is not necessarily the case. No similar studies have  
44 been reported previously so we are unable to make comparisons, or to comment on  
45 whether a similar number of comments, negative or positive, are being made about other  
46 medical career choices. The majority of negative comments were made by hospital doctors;  
47 there were also negative comments from GPs whereas GPSTs appear to be championing  
48 their specialty.  
49  
50  
51  
52

### 53 **Nature of the comments**

54  
55 Findings from the survey and the focus group triangulate the nature of comments made and  
56 correlate with the limited previous exploratory work in this area.[4, 25, 26, 27]Positive  
57  
58  
59  
60

1  
2  
3 comments centre around the concept that choosing GP is a positive, family focused choice  
4 which facilitates a good work/life balance, as supported by previous work;[18] paradoxically  
5 this may have a negative impact on career choice by suggesting that GP is less challenging  
6 than other specialties. The frequent negative comments about the workload of GP is  
7 perhaps not surprising given the current context of primary care within the NHS in the  
8 UK.[28] More worrying, are the negative themes around the belief that GP is boring, a  
9 waste of training and a second class career choice. The notion of trainees being “just a GP”  
10 has been highlighted in a recent editorial.[29] Perceived prestige of specialties has been  
11 shown to be an important factor in career choice[30] and other studies have demonstrated  
12 perceived lack of prestige of GP, with junior doctors portraying it as a choice for those  
13 unsuccessful in other areas, with talk of “ending up” or “falling back” on GP.[18,31,32]

### 14 15 16 17 **Influencing factors**

18  
19 We have proposed an original model (fig 1) to frame the relationship between the factors  
20 found to influence clinicians’ perceptions of GP, how this relates to the comments they  
21 make and the influence that these can potentially have on trainees’ career choice. This  
22 model maps conceptually within the Theory of Planned Behaviour (Figure 2),[33] a model  
23 used to frame a wide variety of behavioural intentions. Perceptions of General Practice  
24 appear to be key, combined with the impact of subjective norms within clinical contexts;  
25 both primary and secondary care settings. This behavioural model suggests that to tackle  
26 the problem of negative comments about GP as a career choice we need to address both  
27 the factors that influence this perception of GP and the clinical contextual settings, whilst  
28 also addressing individuals’ beliefs that they can change their behaviour.

29  
30  
31 The causative factors that our study suggests are influencing perceptions, and therefore  
32 comments, about GP may be interlinked: Older consultants are suggested in the focus  
33 group study to be more likely to make negative comments suggesting that “tribalism” within  
34 medicine may be less of a problem with the new generation who have had more exposure  
35 to GP as FDs or medical students. Acute specialties may generate more negative comments  
36 due to the link with referral behaviour: specialties in which their increased workload is  
37 perceived to be due to transfer of work from primary care appear more likely to make  
38 negative comments. In contrast, several factors centred around increased understanding of  
39 a GPs’ role, appear to make positive comments more likely: having a GP as a family  
40 member, GP role models and previous exposure to GP. These are all relatively original  
41 findings in the context of the influence they have on perceptions of, and comments about,  
42 GP by clinicians in training settings. Similarly, the portrayal of GP as a lonely career and the  
43 uncertain future of the NHS appear to be influencing factors that are worth confirming and  
44 exploring further.

45  
46  
47  
48  
49 A crucial question is whether denigration of GP does influence career decisions, given that  
50 this “friendly banter”, as it sometimes portrayed,[23] is not a new phenomenon.[13]  
51 Narratives from our trainees would suggest that the answer is clearly in the affirmative,  
52 which would support suggestions from previous studies in other contexts.[4,9]

### 53 54 **Strengths and Limitations**

55  
56 Our multi-method study provides triangulation of our findings from two contrasting sources.  
57 The high response rate in the survey and relatively large number of participants in the focus  
58

1  
2  
3 group study supports the validity and trustworthiness of the findings. Although the results  
4 are from one region of the United Kingdom only, there is no theoretical reason why they  
5 would not be generalisable, certainly across England, and probably the UK. There are some  
6 limitations of the study, one being participant recall. We would suggest prospective studies  
7 be undertaken of comments made to medical students and/or trainees. Although the mixed  
8 method aids triangulation of our findings these are some differences between the survey  
9 and focus groups: For example, the survey questions asked trainees about comments made  
10 in their most recent placement only, due to being a component of the trainees post-  
11 placement evaluation, whereas the more open and explorative focus group discussions  
12 included comments heard throughout their undergraduate and postgraduate training.  
13 Additionally, focus group participants were GPSTs and we were therefore not able to  
14 determine whether any potential applicants to GP training had truly been dissuaded due to  
15 negative comments.  
16  
17  
18

### 19 **Implications**

20  
21 Our study has a number of important implications for medical schools, General Practices,  
22 Secondary care trusts, HEE and the UK NHS as a whole. Most urgently, we have  
23 demonstrated that negative comments about GP as a career are being made to trainees in  
24 clinical settings and trainees' perceptions are that these comments do influence career  
25 choice. Undermining of GP, and we would extend this to "tribalism" within the medical  
26 workforce in general, must be addressed urgently and cohesively within the NHS and  
27 training facilities with a "zero tolerance" policy. We would highly endorse the  
28 recommendations of the HEE/MSc report within medical schools and extend this to all  
29 clinical and postgraduate training settings to tackle undermining of GP as a career choice.[8]  
30  
31

32  
33 Our explanatory model (figure 1) would suggest that influencing the factors that lead to  
34 individuals' perception of GP, and the clinical contextual settings in which they work, would  
35 potentially address the problem of negative comments about GP as a career choice. In  
36 addition, increasing time spent in GP as a medical student and FD, with positive role  
37 modelling, would appear to increase the likelihood of trainees becoming GPs.[34, 35] The  
38 move to a single GMC Specialty Register and title of 'consultant in primary or community  
39 care' may also improve the prestige and respect of GPs amongst their colleagues.[29] Finally,  
40 there also appears to be work that GPs can do themselves to raise the profile of their  
41 discipline, such as avoiding making undermining comments of their own career.[29]  
42  
43

### 44 **Further work/Conclusion**

45  
46 Our study corroborates anecdotal evidence of denigration of GP in clinical settings within  
47 the UK and suggests the need to work towards a "zero tolerance" of undermining of career  
48 choice. It also reveals several underlying factors influencing the perception of GP and thus,  
49 the likelihood of clinicians making negative, and positive, comments about GP as a career  
50 choice. We would strongly recommend that further explorative work and quantitative  
51 surveys are undertaken to explore the extent to which our findings are confirmed nationally  
52 and internationally, and to confirm to what extent they are discouraging students and  
53 trainees from following a career in GP. We have hypothesised an original model, based on  
54 motivational theory, to explore the influence of comments made and would recommend  
55 that this model be tested in other clinical contexts to confirm and build on our findings. In  
56 addition, we would recommend that work be undertaken to explore undermining of  
57  
58  
59  
60

1  
2  
3  
4  
5  
6  
7  
8  
9  
10  
11  
12  
13  
14  
15  
16  
17  
18  
19  
20  
21  
22  
23  
24  
25  
26  
27  
28  
29  
30  
31  
32  
33  
34  
35  
36  
37  
38  
39  
40  
41  
42  
43  
44  
45  
46  
47  
48  
49  
50  
51  
52  
53  
54  
55  
56  
57  
58  
59  
60

hospital medicine by GPs and other clinicians. Badmouthing of all specialities, including GP, whether in the primary or secondary care setting, must be addressed and confronted as a discriminatory issue.

For peer review only

## References

- 1 General Practice National Recruitment Office. Recruitment Figures 2015: General Practice ST1. Available at: <https://gprecruitment.hee.nhs.uk/Portals/8/Documents/Annual%20Reports/GP%20ST1%20Recruitment%20Figures%202015.pdf?ver=2015-12-18-140824-470> (Accessed: April 2017).
- 2 NHS England. General Practice Forward View, 2016. Available at: <https://www.england.nhs.uk/wp-content/uploads/2016/04/gp-fv.pdf> (Accessed: April 2017).
- 3 Baker M, Wessely S, Openshaw D. Not such friendly banter? GPs and psychiatrists against the systematic denigration of their specialties. *Br J Gen Pract* 2016;66(651):508–9. doi:10.3399/bjgp16X687169
- 4 Ajaz A, David R, Brown D, et al. BASH: Badmouthing, attitudes and stigmatisation in healthcare as experienced by medical students. *BJPsych Bull* 2016;40(2):97–102. doi:10.1192/pb.bp.115.053140
- 5 Lambert TW, Smith F, Goldacre MJ. Trends in attractiveness of general practice as a career: surveys of views of UK-trained doctors. *Br J Gen Pract* 2017;67(657):e238–e247. doi: <https://doi.org/10.3399/bjgp17X689893>
- 6 Ibrahim M, Fanshawe A, Patel V, et al. What factors influence British medical students' career intentions? *Med Teach* 2014;36(12):1064–1072.
- 7 Querido SJ, Vergouw D, Wigersma L, et al. Dynamics of career choice among students in undergraduate medical courses. A BEME systematic review: BEME Guide No. 33. *Med Teach* 2016;38(1):18–29
- 8 Wass V. By choice — not by chance: supporting medical students towards future careers in general practice. London: Health Education England and the Medical Schools Council, 2016. <https://www.hee.nhs.uk/sites/default/files/documents/By%20choice%20not%20by%20chance%20web%20FINAL.pdf> (accessed April 2017)
- 9 Hunt DD, Scott C, Zhong S, et al. Frequency and effect of negative comments (“badmouthing”) on medical students' career choices. *Acad Med* 1996;71(6):665–9. doi:10.1097/00001888-199606000-00022
- 10 Holmes D, Tumiel-Berhalter L, Zayas L, et al. “Bashing” of Medical Specialties: Students Experiences and Recommendations. *Fam Med* 2008;40(6):400–6.
- 11 Shafer, S, Shore W, French L, et al. Rejecting Family Practice: Why Medical Students Switch to Other Specialties. *Fam Med* 2000;32(5):320–5.
- 12 Stephens M, Lennon C, Durning S, et al. Professional Badmouthing: Who Does It and How Common Is It? *Fam Med* 2010;42(6):388–90.
- 13 Brooks JV. Hostility during training: Historical roots of primary care disparagement. *Ann Fam Med* 2016;14(5):446–52. doi:10.1370/afm.1971



- 1  
2  
3 14 Phillips SP, Clarke M. More than an education: The hidden curriculum, professional attitudes and  
4 career choice. *Med Educ* 2012;46(9):887–93. doi:10.1111/j.1365-2923.2012.04316.x  
5  
6 15 Pianosi K, Bethune C, Hurley KF. Medical student career choice: A qualitative study of fourth-year  
7 medical students at memorial university, Newfoundland. *CMAJ Open* 2016;4(2):e147–52.  
8 doi:10.9778/cmajo.20150103  
9  
10 16 Tolhurst H, Stewart M. Becoming a GP – a qualitative study of the career interests of medical  
11 students. *Aust Fam Physician* 2005;34:204–6.  
12  
13 17 Erikson CE, Danish S, Jones K C, et al. The role of medical school culture in primary care career  
14 choice. *Acad Med* 2013;88(12):1919–26. doi:10.1097/acm.0000000000000038  
15  
16 18 Nicholson S, Hastings AM, McKinley RK. Influences on students' career decisions concerning  
17 general practice: A focus group study. *Br J Gen Pract* 2016 66(651):e768-75.  
18 doi:10.3399/bjgp16x687049  
19  
20 19 Alberti H, Merritt K. Confronting the bashing: Fundamental questions remain. *Br J Gen Pract*  
21 2016;66(653):604–5. doi:10.3399/bjgp16x688081  
22  
23 20 Guba EG, Lincoln. Fourth Generation Evaluation. Sage, 1989.  
24  
25 21 Bryman A. Social Research Methods. Oxford University Press. 2001.  
26  
27 22 Illing J. Thinking about research: frameworks, ethics and scholarship. *Understanding medical*  
28 *education: evidence, theory and practice*. 2010:283-300. Survey  
29  
30 23 Braun V, Clarke V. Using thematic analysis in psychology. *QualResPsychol* 2006;3(2):77-101. doi:  
31 http://dx.doi.org/10.1191/1478088706qp063oa  
32  
33 24 McDonald P, Jackson B, Alberti H, et al. How can medical schools encourage students to choose  
34 general practice as a career? *Br J Gen Pract* 2016;66(647):292–3. doi:10.3399/bjgp16x685297  
35  
36 25 Edgcumbe DP, Lillicrap MS, Benson JA. A qualitative study of medical students' attitudes to  
37 careers in general practice. *Educ Prim Care* 2008;19(1):65–73.  
38 doi:10.1080/14739879.2008.11493651  
39  
40 26 Evans J, Lambert T, Goldacre M. GP recruitment and retention: a qualitative analysis of doctors'  
41 comments about training for and working in general practice. *Occas Pap R Coll Gen Pract*  
42 2002;83(iii–vi):1–33.  
43  
44 27 Firth A, Wass V. Medical students' perceptions of primary care: The influence of tutors, peers and  
45 the curriculum. *Educ Prim Care* 2007;18(3):364–72. doi:10.1080/14739879.2007.11493562  
46  
47 28 Royal College of General Practitioners. Patient safety implications of general practice workload,  
48 2015. Available at: <http://www.rcgp.org.uk/policy/rcgp-policy-areas/fatigue-in-general-practice.aspx>  
49 (Accessed: April 2017).  
50  
51 29 Wass V, Gregory S. Not 'just' a GP: a call for action. *Br J Gen Pract* 2017;67(657):149-149.  
52  
53  
54  
55  
56  
57  
58  
59  
60

1  
2  
3 30 Curtis-Barton MT, Eagles JM. Factors that discourage medical students from pursuing a career in  
4 psychiatry. *Psychiatrist* 2011;35(11):425–9. doi:10.1192/pb.bp.110.032532

5  
6 31 Petchey R, Williams J, Baker, M. 'Ending up a GP': a qualitative study of junior doctors'  
7 perceptions of general practice as a career. *Fam Pract* 1997;14(3):194-8.

8  
9 32 Merrett A, Jones D, Sein K, et al. Attitudes of newly qualified doctors towards a career in general  
10 practice: a qualitative focus group study. *Br J Gen Pract* 2017;67(657):e253-9.  
11 doi:10.3399/bjgp17X690221

12  
13 33 Ajzen I. From intentions to action: A theory of planned behavior. In Kuhl J, Beckman J, eds Action-  
14 control: From cognition to behavior. Heidelberg: Springer 1985:11-39

15  
16 34 Alberti H, Randles HL, Harding A, et al. Exposure of undergraduates to authentic GP teaching and  
17 subsequent entry to GP training: a quantitative study of UK medical schools. *Br J Gen Pract* 2017;  
18 67(657), pp.e248-e52. doi: <https://doi.org/10.3399/bjgp17X689881>

19  
20 35 Marchand C, Peckham S. Addressing the crisis of GP recruitment and retention: a systematic  
21 review. *Br J Gen Pract* 2017;67(657):e227-e237. doi:10.3399/bjgp17X689929

1  
2  
3  
4  
5  
6  
7  
8  
9  
10  
11  
12  
13  
14  
15  
16  
17  
18  
19  
20  
21  
22  
23  
24  
25  
26  
27  
28  
29  
30  
31  
32  
33  
34  
35  
36  
37  
38  
39  
40  
41  
42  
43  
44  
45  
46  
47  
48  
49  
50  
51  
52  
53  
54  
55  
56  
57  
58  
59  
60

**Figure Legends:**

**Figure 1: Factors influencing clinicians' perceptions of General Practice**

**Figure 2: Theory of Planned Behaviour**

For peer review only

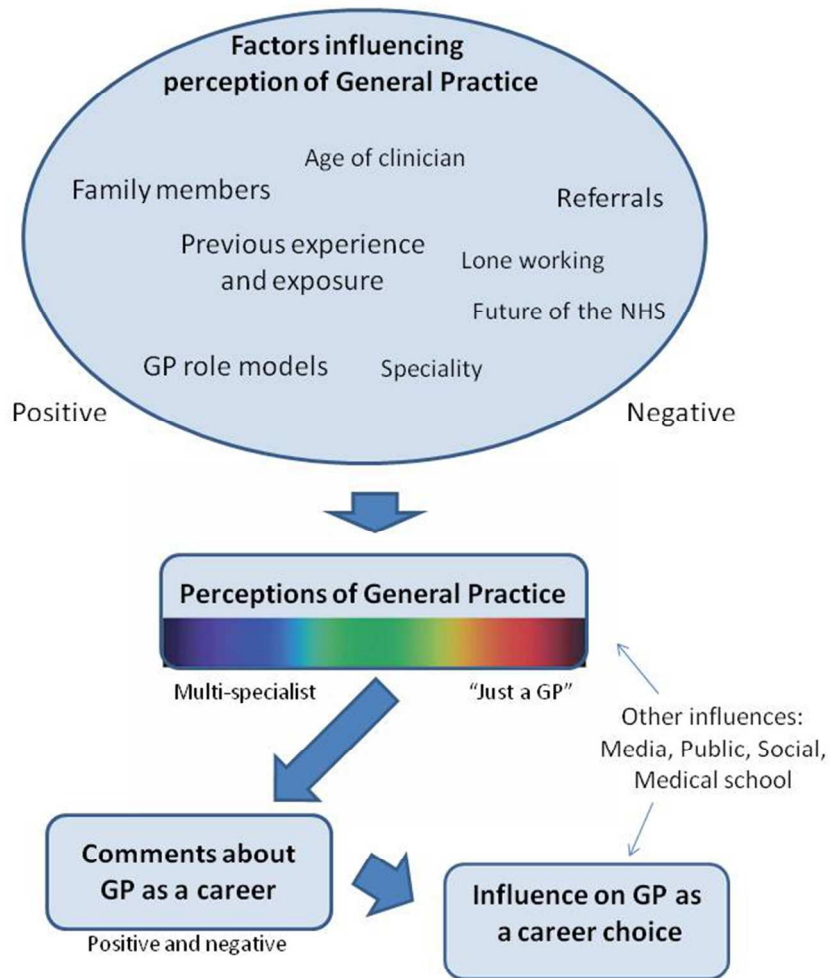

Figure one: Factors influencing clinicians' perceptions of General Practice

60x81mm (300 x 300 DPI)

1  
2  
3  
4  
5  
6  
7  
8  
9  
10  
11  
12  
13  
14  
15  
16  
17  
18  
19  
20  
21  
22  
23  
24  
25  
26  
27  
28  
29  
30  
31  
32  
33  
34  
35  
36  
37  
38  
39  
40  
41  
42  
43  
44  
45  
46  
47  
48  
49  
50  
51  
52  
53  
54  
55  
56  
57  
58  
59  
60

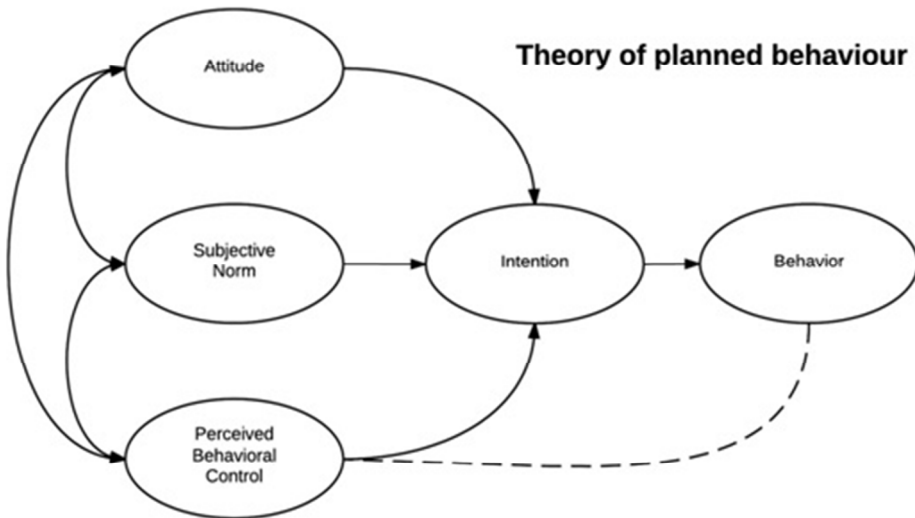

Figure Two: Theory of Planned behaviour

47x28mm (300 x 300 DPI)

review only

1  
2  
3  
4  
5  
6 **Appendix one: Information sheet**  
7 **given to focus group participants.**

8  
9  
10 **Project:**A pilot study exploring the  
11 influence of clinical teachers on  
12 trainee application into General  
13 Practice.  
14

15  
16 **Interviewers:**Dr. Joanna Hall.

17  
18 Dr .KymberleeMerritt  
19 kmerritt@nhs.net  
20  
21

22 **Lead researcher:**  
23 hugh.alberti@ncl.ac.uk  
24  
25

26 **Information Sheet**  
27

28 Thank you for taking the time to  
29 read this information sheet.  
30  
31

32 Our names are Dr. Joanna Hall and  
33 Dr.Kymberlee Merritt and we are a  
34 GP and a GP trainee working with Dr Hugh Alberti, Sub Dean for primary care at Newcastle  
35 University.  
36  
37

38 **What is the study about?**  
39

40  
41 *Difficulty recruiting trainees into GP training programmes at both local and national level*  
42 *represents a significant problem for NHS workforce planning. One factor thought to*  
43 *influence career choice is verbalised opinions from clinical teachers.. The study will explore*  
44 *comments, both negative and positive that were made to GP trainees about their choice of*  
45 *General Practice as a career, both as medical students and when they were foundation*  
46 *doctors. We will discuss whether these comments influenced career choice.*  
47  
48

49 **Why is the study being done?**  
50

51  
52 This study is being carried out to explore the influences that may affect medical student and  
53 foundation doctor career choices. The study is being carried out in order to improve GP  
54 trainee recruitment.  
55

56 **What does taking part in the study involve?**  
57

58  
59 *The study will involve being part of a focus group where we will have discussions regarding*  
60 *any comments made to GP trainees whilst they were medical students or Foundation doctors*  
*about a career choice in General Practice. The focus groups will follow a semi structured*

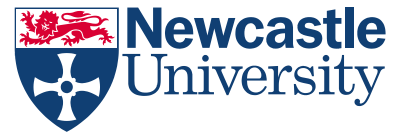

School of Medical Education

Medical School

Newcastle University

NE2 4HH

1  
2  
3 *interview format. Interviews will be digitally recorded and professionally transcribed. Results*  
4 *will be analysed using thematic analysis.*  
5  
6

7 **What if I decide I do not want to take part in the study, or I want to pull out once it has started?**  
8

9 You are free to decline to be interviewed and free to withdraw from the study at any time.  
10

11 **What about confidentiality?**  
12

13  
14 The interview will be kept strictly confidential and will be available only to ourselves and the  
15 research team. Excerpts from the interview may be made part of the final research report, but under  
16 no circumstances will your name or any identifying characteristics be included in the report.  
17  
18  
19  
20  
21  
22  
23  
24  
25  
26  
27  
28  
29  
30  
31  
32  
33  
34  
35  
36  
37  
38  
39  
40  
41  
42  
43  
44  
45  
46  
47  
48  
49  
50  
51  
52  
53  
54  
55  
56  
57  
58  
59  
60

**Appendix two: Consent form for focus group participants**

**Project:**A pilot study exploring the influence of clinical teachers on trainee application into General Practice.

**Interviewers** Dr. Joanna Hall, Dr.Kymerlee Merritt

**Lead researcher:**hugh.alberti@ncl.ac.uk

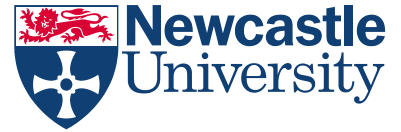

**School of Medical Education**

MedicalSchool

NewcastleUniversity

NE2 4HH

**Consent Form**

- I confirm that I have read and understood the Information Sheet.
- I confirm that the study has been explained to my satisfaction and I have had a chance to ask questions.
- I know who to contact if I have any questions later.
- I understand participation is voluntary and that I can withdraw at any time without giving a reason.
- I understand that the focus group/interview, both the recording and the typed copy, will be held confidentially.
- I agree to anonymised excerpts of my interview being used in research publication.
- I agree to take part.

Name of Participant .....

Signature of Participant .....

Date .....

Name of Researcher .....

Signature of Researcher .....

Date .....



**Consolidated criteria for reporting qualitative studies (COREQ): 32-item checklist**

## Domain 1: Research team and reflexivity

## Personal Characteristics

1. Interviewer/facilitator Which author/s conducted the interview or focus group?

KM and HA did 3 each

2. Credentials What were the researcher's credentials? E.g. PhD, MD

KM is a GP trainee doing an education posts at the university that included the CertMedEd. HA is an experienced qualitative researcher with an MD and MMedEd

3. Occupation What was their occupation at the time of the study?

GP and GP trainee

4. Gender Was the researcher male or female?

One male and one female

5. Experience and training What experience or training did the researcher have?

KM is doing the CertMedEd; HA has an MD and MMedEd

## Relationship with participants

6. Relationship established Was a relationship established prior to study commencement?

No. HA knew some of the trainees from the Training Programme and had taught a minority of them in the past

7. Participant knowledge of the interviewer What did the participants know about the researcher?  
e.g. personal goals, reasons for doing the research

Aware we are GP/GP trainee interested in this area

8. Interviewer characteristics What characteristics were reported about the interviewer/facilitator?  
e.g. Bias, assumptions, reasons and interests in the research topic

Participants were aware that we had an interest in this area as GP educators with a non-stated assumption that comments are being made about GP as a career and that this should not happen.

## Domain 2: study design

## Theoretical framework

9. Methodological orientation and Theory What methodological orientation was stated to underpin the study? e.g. grounded theory, discourse analysis, ethnography, phenomenology, content analysis

Post-positivist paradigm with mixed method methodology

1  
2  
3 Participant selection

4  
5 10. Sampling How were participants selected? e.g. purposive, convenience, consecutive, snowball

6  
7 Purposive selection of ST1s (year 1 GP trainees) and convenience sample of the ST1s.

8  
9 11. Method of approach How were participants approached? e.g. face-to-face, telephone, mail,  
10 email

11  
12 Email invitation

13  
14 12. Sample size How many participants were in the study?

15  
16 Focus group interviews varied in size from three to fourteen participants with an average size of  
17 eight (total number of participants = 49

18  
19 13. Non-participation How many people refused to participate or dropped out? Reasons?

20  
21 No drop outs. All ST1s were invited.

22  
23 14. Setting of data collection Where was the data collected? e.g. home, clinic, workplace

24  
25 Teaching room.

26  
27 15. Presence of non-participants Was anyone else present besides the participants and  
28 researchers?

29  
30 No

31  
32 16. Description of sample What are the important characteristics of the sample? e.g. demographic  
33 data, date

34  
35 Demographic details not collected

36  
37 Data collection

38  
39 17. Interview guide Were questions, prompts, guides provided by the authors? Was it pilot tested?

40  
41 Yes. No pilot tested.

42  
43 18. Repeat interviews Were repeat interviews carried out? If yes, how many?

44  
45 No

46  
47 19. Audio/visual recording Did the research use audio or visual recording to collect the data?

48  
49 Yes: audio

50  
51 20. Field notes Were field notes made during and/or after the interview or focus group?

52  
53 Yes

54  
55 21. Duration What was the duration of the interviews or focus group?

1  
2  
3 30-40minutes  
4

5 22. Data saturation Was data saturation discussed?  
6

7 Yes – after the 6 focus groups the data was reviewed by the team and it was felt that no new themes  
8 were emerging.  
9

10 23. Transcripts returned Were transcripts returned to participants for comment and/or correction?  
11

12 No  
13

14 Domain 3: analysis and findings  
15

16 Data analysis  
17

18 24. Number of data coders How many data coders coded the data?  
19

20 KM and HA  
21

22 25. Description of the coding tree Did authors provide a description of the coding tree?  
23

24 No but available on request  
25

26 26. Derivation of themes Were themes identified in advance or derived from the data?  
27

28 Derived from the data  
29

30 27. Software What software, if applicable, was used to manage the data?  
31

32 None used  
33

34 28. Participant checking Did participants provide feedback on the findings?  
35

36 No  
37

38 Reporting  
39

40 29. Quotations presented Were participant quotations presented to illustrate the themes /  
41 findings? Was each quotation identified? e.g. participant number  
42

43 No – the participants were not identified  
44

45 30. Data and findings consistent Was there consistency between the data presented and the  
46 findings?  
47

48 Yes we believe so  
49

50 31. Clarity of major themes Were major themes clearly presented in the findings?  
51

52 Yes we believe so  
53

54 32. Clarity of minor themes Is there a description of diverse cases or discussion of minor themes?  
55

56 Yes  
57  
58  
59  
60
